# Supplementary material for: Seismic signature of turbulence during the 2017 Oroville Dam spillway erosion crisis
Source: Copernicus journal article supplement (doi:10.5194/esurf-2017-71), 2018-01-02
Supplement: Supplementary file 1 [file esurf-2017-71-supplement.zip]

Archive with 13 entries (13 files):
- 20151111_Oroville_LiDAR.txt
- 20170323_Oroville_LiDAR.TXT
- Example FDPA on ORV Data/BK_ORV_BHE.mseed
- Example FDPA on ORV Data/BK_ORV_BHN.mseed
- Example FDPA on ORV Data/BK_ORV_BHZ.mseed
- Example FDPA on ORV Data/Example FDPA on ORV data.m
- Example FDPA on ORV Data/FDPA_Park_Attributes.m
- Example FDPA on ORV Data/Fig_1_Polarization_Results.png
- Example FDPA on ORV Data/Fig_2_Component_PSD.png
- Example FDPA on ORV Data/rdmseed.m
- Goodling_Lekic_Prestegaard_Oroville_Supplemental_Materials.docx
- Oroville_Spillway_02-24-2017_Project_Metadata.pdf
- Oroville_Spillway_02-28-2017_Project_Metadata.PDF
