# Supplementary material for: Seismic signature of turbulence during the 2017 Oroville Dam spillway erosion crisis
Source: Copernicus journal article supplement (doi:10.5194/esurf-2017-71), 2018-01-02
Supplement: Supplementary file 1 [file esurf-2017-71-supplement.zip › 20151111_Oroville_LiDAR.txt]

6700075.86	2322073.77	320.68
6700127.11	2322120.5	316.22
6700155.68	2322174.89	313.57
6700169.2	2322178.87	309.4
6700173.01	2322122.15	312.9
6700201.59	2322131.24	310.49
6700200.42	2322126.78	310.87
6700190.17	2322112.97	315.46
6700191.75	2322110.71	313.07
6700224.55	2322124.38	310.11
6700202.48	2322128.25	314.47
6700225.21	2322167.43	304.2
6700232.39	2322156.31	305.37
6700241	2322156.28	304.73
6700248.51	2322157.59	306.36
6700273.35	2322123.19	310.39
6700281.31	2322145.84	306.43
6700298.48	2322148.76	308.01
6700319.7	2322128.37	309.39
6700324.45	2322078.11	318.23
6700264.82	2322099.26	314.2
6700263.28	2322106.95	315.4
6700261.17	2322108.95	312.65
6700254.76	2322090.44	314.83
6700224.33	2322074.45	317.69
6700245.1	2322071.59	318.23
6700230.8	2322063.36	321.55
6700230.6	2322061.73	319.5
6700171.32	2322033.7	323.42
6700175.88	2322075.86	318.05
6700188.78	2322109.61	313.36
6700121.37	2322073.11	319.13
6700128.19	2322049.25	321.28
6700097.93	2322047.98	321.61
6700127.02	2322018.01	324.08
6700132.75	2322043.87	324.44
6700160.83	2322032.7	323.33
6700163.47	2322025.52	324.68
6700177.38	2321975.37	330.14
6700124.59	2321973.23	325.71
6700071.1	2321974.93	318.19
6700069.62	2322024.01	319.42
6700043.6	2322008.38	315.43
6700032.55	2322028.47	318.13
6700032.12	2322027.95	320.41
6700031.27	2322035.57	317.96
6700030.33	2322002.02	313.26
6700029.68	2322024.86	317.2
6700034.86	2321992.86	315.65
6700159.73	2322195.21	309.9
6700220.78	2322214.8	303
6700213.18	2322228.29	301.4
6700225.07	2322227.46	299.5
6700225.89	2322214.67	300.05
6700235.38	2322219.91	301.35
6700232	2322214.16	301.7
6700238.64	2322213.97	298.56
6700231.9	2322210.68	298.5
6700215.41	2322210.53	301.63
6700242.85	2322178.45	301.34
6700244.71	2322206.02	298.49
6700253.64	2322177.94	300.79
6700250.89	2322175.94	305.81
6700247.92	2322171.75	302.88
6700240.02	2322168.16	303.09
6700235.02	2322158.89	309.5
6700250.9	2322166.47	302.56
6700277.25	2322173.69	301.32
6700281.91	2322150.39	305.35
6700300.08	2322183.62	298.21
6700312.27	2322180.22	298.47
6700304.94	2322186.2	299.79
6700305.01	2322194.4	297.27
6700294.21	2322192.84	297.56
6700294.94	2322188.79	300.89
6700292.39	2322187.3	298.63
6700293.94	2322185.8	298.1
6700295.81	2322184.34	300.48
6700282.34	2322192.48	297.04
6700274.63	2322191.15	297.51
6700275.1	2322200.93	298.58
6700286.2	2322199.95	297.87
6700278.44	2322204	295.37
6700284.79	2322212.01	293.58
6700297.46	2322198.17	295.77
6700300.14	2322194.43	298.07
6700304.54	2322199.28	297.82
6700308.19	2322197.22	299.28
6700310.91	2322190.98	297.29
6700313.92	2322193.26	298.78
6700322.9	2322186.15	301.45
6700323.16	2322181.28	298.72
6700326.71	2322178.39	299.26
6700327.67	2322182.7	298.35
6700347.82	2322172.16	299.98
6700376.16	2322127.61	308.4
6700375.47	2322173.57	299.37
6700432.12	2322145.66	305.42
6700427.11	2322125.15	308.95
6700432.58	2322087.1	315.66
6700452.3	2322105.56	311.3
6700447.65	2322099.98	315.05
6700451.73	2322099.22	315.15
6700453.56	2322081.47	316.15
6700474.28	2322077.92	316.28
6700451.69	2322077.85	316.86
6700453.48	2322066.82	321.22
6700448.07	2322058.4	320.66
6700466.64	2322047.57	322.47
6700440.63	2322038.94	324.48
6700472.83	2322021.64	327.45
6700468.41	2322045.87	325.41
6700475.78	2322040.76	326.14
6700517.85	2322054.63	318.5
6700518.98	2322076.17	314.1
6700520.51	2322058.03	319.97
6700523.37	2322056.09	318.74
6700533.93	2322053.3	318.32
6700527	2322052.08	320.84
6700525.92	2322027.11	324.62
6700498.21	2322035.03	323.7
6700497.2	2322030.31	326.8
6700493.5	2322032.24	324.83
6700492.45	2322026.01	326.55
6700492.23	2322028.04	327.44
6700482.73	2322022.95	326.81
6700480.8	2322016.75	330.97
6700481.33	2322007.14	329.75
6700475.6	2322001.49	331.51
6700441.63	2321999.62	332.17
6700457.38	2321988.83	334.27
6700436.35	2321994.27	333.2
6700454.53	2321978.06	335.7
6700427.08	2321980.19	335.94
6700428.46	2321993.24	333.42
6700431.77	2321998.2	336.22
6700428.47	2322002.85	331.75
6700440.68	2322001.74	332.04
6700430.48	2322032.34	326.05
6700417.41	2322018.71	328.72
6700429.41	2322032.17	328.7
6700435.67	2322041.22	323.98
6700422.23	2322035.11	325.01
6700373.46	2322073.72	317.92
6700374.14	2322028.3	328.22
6700371.31	2322010.81	333.21
6700423.54	2321973.46	337.46
6700369.7	2321971.21	337.93
6700326.67	2321969.6	336.36
6700325.12	2322022.69	327.5
6700290.76	2321967.75	335.61
6700293.25	2321956.32	337.83
6700316.63	2321946.99	340.09
6700308.84	2321937.69	341.21
6700317.78	2321944.61	343.4
6700319.69	2321940.72	341.09
6700329.88	2321950.73	342.2
6700338.37	2321946.81	340.82
6700329.64	2321925.17	345
6700375.05	2321928.52	346.17
6700343.35	2321879.99	352.62
6700321.78	2321907.68	346.75
6700324.86	2321902.46	348.09
6700321.91	2321904.17	351.68
6700316.76	2321904.71	350.15
6700323.17	2321898.17	348.43
6700309.33	2321902.07	346.73
6700313.51	2321906.15	346.84
6700312.56	2321928.8	342.75
6700305.35	2321926.16	342.81
6700276.97	2321919.42	342.01
6700276.96	2321876.34	348.34
6700316.75	2321884.21	350.93
6700334.03	2321876.7	352.81
6700328.65	2321883.57	353.55
6700341.4	2321873.55	354.69
6700342.9	2321866.88	358.14
6700340.6	2321861.51	356.02
6700323.67	2321821.12	360.55
6700273.53	2321824.57	354.35
6700228.8	2321874.11	343.5
6700219.55	2321923.16	338.37
6700240.44	2321937	339.72
6700268.99	2321948.5	337.41
6700236.43	2321985.3	331.22
6700287.86	2321965.24	336.15
6700289.28	2321957.31	338.1
6700238.09	2322004	328.6
6700234.81	2322000.59	331.94
6700230.64	2321997.74	329.78
6700217.07	2322004.88	328.36
6700222.79	2321994.92	329.86
6700220.35	2321992.58	330.06
6700223.32	2321990.91	334.2
6700223.01	2321990.3	330.3
6700222.08	2321971.49	332.95
6700202.29	2321936.9	335.12
6700167.73	2321931.79	332.41
6700175.66	2321928.8	335.93
6700174.33	2321921.14	333.68
6700174.77	2321924.22	337.12
6700148.01	2321922.56	329.16
6700147.51	2321952.03	330.16
6700137.46	2321926.71	327.75
6700139.45	2321922.98	330.9
6700222.84	2322268.49	298.42
6700256.73	2322275.92	292.28
6700258.54	2322317.18	291.6
6700273.09	2322277.01	289.62
6700280.17	2322268.26	289.18
6700266.61	2322263.34	291.27
6700261.1	2322261.69	294.3
6700260.33	2322259.2	292.21
6700255.59	2322228.83	293.81
6700235.05	2322237.92	297
6700209.31	2322255.97	300.51
6700210.19	2322235.54	301.33
6700204.7	2322246.83	304.6
6700203.47	2322253.58	304.05
6700195.69	2322241.52	302.97
6700231.5	2322230.83	300.42
6700235.79	2322225.58	297.66
6700238.32	2322220.83	300.14
6700254.93	2322221.51	295.66
6700245.64	2322217.04	296.08
6700242.1	2322211.51	300.6
6700252.55	2322215.29	297.31
6700265.32	2322204.34	296.45
6700260.27	2322215.18	295.78
6700271.89	2322206.93	298.27
6700273.7	2322208.09	294.98
6700275.69	2322204.66	295.25
6700275.11	2322214.76	295.01
6700279.07	2322235.83	290.65
6700287.45	2322227.87	292.6
6700284.09	2322239.34	290.6
6700281.75	2322241.26	289.75
6700305.64	2322250.15	286.32
6700302.23	2322234.54	288.69
6700290.83	2322229.83	291.11
6700295.17	2322221.03	294.01
6700292.56	2322215.99	294.02
6700297.05	2322215.68	291.81
6700297.03	2322213.28	294.45
6700292.13	2322209.94	293.15
6700306.36	2322212.09	292.36
6700303.89	2322201.72	294.26
6700308.17	2322205.25	293.41
6700311.93	2322206.08	295.95
6700326.41	2322208.42	292.06
6700328.58	2322226.53	288.43
6700317.92	2322229.5	288.85
6700322.37	2322230.65	288.67
6700320.89	2322232.07	292.65
6700322.55	2322235.68	287.54
6700318.83	2322241.69	288.5
6700314	2322243.41	287.31
6700320.28	2322244.68	286.55
6700323.56	2322259.42	281.04
6700329.2	2322264.48	279.53
6700326.14	2322271.89	280.11
6700331.83	2322271.67	280.5
6700338.76	2322268.87	279.41
6700334.49	2322259.92	283.48
6700331.24	2322249.71	284.17
6700343.48	2322253.4	283.2
6700354.69	2322266.16	279.72
6700347.65	2322244.06	285.78
6700343.33	2322242.24	289.18
6700337.11	2322243.63	285.67
6700339.77	2322241.12	289.61
6700341.34	2322238.26	286.97
6700336.14	2322240.27	288.87
6700338.69	2322235.74	286.63
6700331.07	2322238.43	287.04
6700335.83	2322232.43	288.14
6700339.58	2322227.67	287.95
6700327.11	2322233.39	291.26
6700327.34	2322229.82	291.62
6700357.61	2322188.4	296.45
6700351.05	2322226.89	288.65
6700361.27	2322224.37	289.19
6700353.17	2322227.84	288.1
6700357.57	2322240.17	287.69
6700351.79	2322239.18	285.87
6700348.06	2322230.22	287.73
6700376.38	2322224.54	289.41
6700378.15	2322256.8	281.54
6700387.97	2322259.68	281.36
6700384.75	2322262.58	283.57
6700383.39	2322268	280.1
6700393.21	2322276.6	278.88
6700396.42	2322265.61	281.13
6700430.51	2322254.36	284.32
6700424.01	2322239.06	286.18
6700430.87	2322240.01	286.41
6700426.01	2322230.11	289.56
6700430.83	2322176.77	300
6700356.65	2322176.11	301.57
6700353.61	2322182.79	299.96
6700345.25	2322188.36	296.53
6700346.38	2322177.73	301.91
6700335.84	2322180.15	298.71
6700332.97	2322186.43	299.52
6700324.44	2322186.38	297.52
6700314.85	2322196.47	295.19
6700314.88	2322206.36	293
6700447.42	2322213.31	294.27
6700475.03	2322183.47	297.13
6700439.97	2322141.93	305.78
6700436.96	2322141.14	308.12
6700492.36	2322154.53	302.6
6700494.45	2322196.81	293.34
6700474.38	2322229.71	287.85
6700501.52	2322214.65	289.35
6700501.41	2322199.36	289.64
6700525.52	2322175.57	291.3
6700517.02	2322206.74	287.09
6700507.58	2322211.37	286.44
6700502.97	2322214.17	286.89
6700505.71	2322218.97	287.46
6700512.14	2322217.42	282.95
6700499.24	2322227.77	282.55
6700517.31	2322233.01	282.08
6700526.85	2322228.98	281.15
6700523.97	2322210.71	281.97
6700522.85	2322207.1	285.14
6700528.04	2322203.64	282.54
6700535.6	2322216.18	281.72
6700548.98	2322193.46	281.69
6700557.08	2322200.6	279.79
6700555.2	2322195.48	283.9
6700568.24	2322191.03	283.79
6700554.42	2322191.79	281.78
6700559.48	2322184.65	282.05
6700570.33	2322182.01	282.83
6700568.86	2322170.34	285.25
6700577.2	2322169.61	283.99
6700569.75	2322165.4	290.06
6700580.12	2322164.52	284.72
6700586.15	2322166.47	284.26
6700586.12	2322175.51	284.72
6700581.45	2322183.36	282.42
6700587.35	2322183.26	282.35
6700590.46	2322173.48	285.1
6700590.62	2322167.91	284.16
6700587.95	2322165.67	287.52
6700588.6	2322159.96	285.46
6700594.18	2322165.01	284.88
6700594.65	2322158.42	288.17
6700594.81	2322155.4	286.37
6700582.78	2322151.55	289.66
6700576.21	2322156.52	292.15
6700572	2322155.28	289.82
6700571.59	2322153.14	290.26
6700565.92	2322150.18	291.97
6700562.67	2322157.97	290.14
6700566.39	2322160.69	291.56
6700555.88	2322164.71	288.58
6700558.67	2322167.55	290.3
6700553.78	2322179.43	287.03
6700547.7	2322172.36	290.52
6700544.89	2322166.25	292.58
6700553.53	2322181.91	283.94
6700554.37	2322187.33	284.93
6700534.94	2322129.88	302.27
6700560.3	2322141.31	294.98
6700563.54	2322145.14	295.86
6700579.06	2322123.87	298.21
6700592.59	2322142.74	291.57
6700604.04	2322129.15	295.97
6700611.33	2322111.52	296.74
6700606.12	2322092.55	304.76
6700600.09	2322086.2	304.27
6700562.77	2322089.15	309.94
6700537.24	2322106.29	309.16
6700550.13	2322086.12	309.38
6700561.19	2322070.34	312.34
6700572.47	2322075.12	309.73
6700592.84	2322080.13	309.48
6700589.22	2322072.05	309.03
6700578.23	2322057.25	313.43
6700565.08	2322069.88	314.43
6700571.93	2322052.23	314.95
6700582.35	2322054.56	316.47
6700583.07	2322043.82	316.3
6700567.67	2322040.54	318.45
6700535.64	2322056.82	319.75
6700579.92	2322030.16	322.42
6700583.35	2322029.74	318.94
6700579.07	2322020.48	323.95
6700589.47	2322022.28	319.22
6700585.7	2322012.46	321.95
6700574.52	2322003.06	328.39
6700563.24	2322002.94	326.76
6700571.65	2322026.46	321.36
6700565.66	2322023.8	324.85
6700562.67	2322014.72	327.01
6700517.68	2321998.58	330.83
6700539.82	2321975.08	334.67
6700577.55	2321977.27	333.67
6700545.51	2321962.74	337.63
6700567.74	2321959.43	337.4
6700571	2321958.1	338.65
6700588.15	2321964.2	338.45
6700581.04	2321932.82	346.22
6700572.69	2321934.39	344.61
6700564.41	2321952.64	342.02
6700548.78	2321937.1	344.03
6700556.47	2321952.88	339.91
6700543.39	2321947.34	341.63
6700542.35	2321947.1	344.02
6700537.75	2321945.83	341.89
6700532.63	2321945.69	344.13
6700535.92	2321968.57	336.73
6700497.22	2321954.05	340.34
6700525.4	2321978.82	335.15
6700516.33	2321995.39	331.7
6700506.24	2321988.75	333.05
6700489.42	2321959.54	339.55
6700483.1	2321966.3	339.38
6700485.11	2321970.49	337.28
6700477.7	2321969.23	339.82
6700476.11	2321976.94	336.03
6700501.52	2321999.03	333.4
6700476.48	2321995.99	332.37
6700468.55	2321981	335.55
6700469.08	2321969.69	339.49
6700466.49	2321975.13	337.25
6700463.37	2321968.53	338.64
6700464.47	2321973.87	340.21
6700462.96	2321982.46	335.42
6700457.39	2321986.96	335.19
6700462.78	2321988.68	336.54
6700464.25	2321965.32	339.31
6700445.64	2321967.61	338
6700427.3	2321977.26	337.64
6700426.9	2321964.56	339.44
6700424.38	2321968	341.34
6700422.19	2321962.57	339.51
6700388.49	2321955.77	340.99
6700402.15	2321948.94	342.03
6700397.44	2321948.99	344.55
6700397.87	2321946.41	342.6
6700421.42	2321923.83	346.41
6700373.87	2321876.63	355.47
6700421.2	2321873.83	356.06
6700407.35	2321857.08	361.3
6700385.95	2321820.1	365.65
6700399.57	2321811.27	367.45
6700425.86	2321821.56	366.97
6700393.44	2321804.64	368.37
6700394.54	2321809.48	370.79
6700390.34	2321811.62	367.99
6700374.17	2321772.86	372.61
6700538.52	2322513.63	226.12
6700414.57	2322457.01	230.36
6700406.88	2322459.26	225.99
6700412.89	2322453.83	231.11
6700413.06	2322443.24	226.52
6700436.24	2322433.54	226.1
6700415.13	2322434.38	231.45
6700408.74	2322431.72	233.16
6700407.21	2322448.27	226.15
6700389.29	2322448.27	232.47
6700400.63	2322450.81	226.73
6700394.19	2322460.41	226.08
6700386.85	2322459.21	227.79
6700375.58	2322468.24	226.21
6700334.37	2322407.02	261.35
6700326.54	2322396.69	263.94
6700321.1	2322396.29	261.4
6700337.06	2322384.89	260.17
6700322.29	2322386.71	260.39
6700314.03	2322372.25	260.22
6700314.1	2322370.16	260.37
6700307.03	2322359.25	265.4
6700323.63	2322360.96	262.66
6700312.43	2322346.1	265.09
6700325.43	2322355.97	265.22
6700328.88	2322353.11	265.47
6700330.44	2322335.13	265.7
6700311.73	2322336.32	269.19
6700327.96	2322328.86	275.49
6700306.98	2322330.28	280.61
6700328.6	2322323.92	278.75
6700319.28	2322315.94	282.11
6700273.59	2322324.56	287.95
6700280.62	2322329.9	284.28
6700272.18	2322335.49	279.58
6700282.66	2322346.57	264.63
6700304.26	2322343.12	265.16
6700319.68	2322272.24	280.95
6700321.32	2322276.81	280.47
6700319.96	2322272.34	284.82
6700331.44	2322272.47	278.78
6700339.44	2322277.59	277.29
6700344.22	2322292.87	275.39
6700345.63	2322281.74	275.88
6700344.44	2322278.62	280.73
6700350.23	2322274.8	277.76
6700351.68	2322285.03	274.41
6700357.65	2322279.93	277.69
6700358.84	2322286.65	272.57
6700350.14	2322287.9	278.15
6700346.65	2322295.49	274.27
6700362.86	2322307.26	269.16
6700368.22	2322293.07	270.65
6700376.58	2322298.06	272.71
6700378.93	2322294.66	270.18
6700383.44	2322290.59	271.75
6700382.87	2322296.8	271.06
6700387.02	2322296.68	269.49
6700390.04	2322289.37	273.34
6700392.44	2322287.93	271.08
6700402.69	2322297.69	271.46
6700387.2	2322302.5	269.18
6700397.49	2322303.45	266.79
6700402.66	2322305.1	266.11
6700408.14	2322303.34	270.34
6700413.15	2322297.97	273.09
6700406.9	2322287.56	271.79
6700404.65	2322286.85	271.84
6700404.78	2322281.05	274.36
6700402.91	2322282.86	277.06
6700406.92	2322279.97	273.93
6700384.44	2322287.38	271.04
6700382.39	2322281.6	276.57
6700381.1	2322281.13	276.47
6700380.46	2322287.94	270.37
6700370.56	2322290.1	271.33
6700376.69	2322277.97	277.11
6700362.42	2322287.2	273.94
6700366.44	2322277.22	278.27
6700362.08	2322281.13	278.93
6700360.57	2322281.68	275.38
6700360.23	2322272.74	278.64
6700360.24	2322272.42	281.24
6700344.64	2322276.18	277.81
6700425.75	2322290.05	274.52
6700436.13	2322270.28	278.3
6700448.64	2322280.63	278.2
6700431.32	2322301.51	265.37
6700444.28	2322295.86	266.46
6700447.4	2322299.14	268.26
6700449.11	2322294.44	265.93
6700470.02	2322307.73	265.63
6700448.56	2322317.44	267
6700425	2322320.61	266.22
6700419.47	2322310.78	268.33
6700414.59	2322314	266.07
6700398.58	2322330.29	267.63
6700406	2322343.96	260.85
6700420.7	2322343.86	260.35
6700432.67	2322330.96	261.21
6700435.88	2322326.86	262.77
6700445.67	2322323.49	263.12
6700445.44	2322328.85	264.2
6700451.1	2322328.98	260.63
6700443.14	2322354.35	259.55
6700455.71	2322350.28	259.03
6700478.02	2322338.07	259.63
6700481.58	2322359.34	243.96
6700485.19	2322340.28	256.41
6700496.65	2322353.41	238.61
6700498.33	2322344.32	249.37
6700511.13	2322341.99	246.5
6700509.67	2322351.68	237.76
6700511.54	2322351.73	234.67
6700521.98	2322342.2	239.68
6700503.15	2322329.25	258.61
6700519.84	2322321.45	258.8
6700498.9	2322303.86	260.92
6700498.89	2322328.1	260.28
6700485.38	2322314.51	260.44
6700487.37	2322294.06	267.11
6700497.84	2322289.37	267.82
6700528.87	2322283.96	261.78
6700521.31	2322278.37	266.57
6700547.22	2322273.28	261.57
6700548.47	2322261.62	266.91
6700500.43	2322267.48	265.9
6700541.75	2322242.16	266.21
6700513.43	2322255.44	269.69
6700510.2	2322252.22	276.68
6700507.7	2322251.66	277.74
6700502.86	2322247.95	280.37
6700492.08	2322261.5	278.09
6700486.69	2322252.92	283.08
6700480.8	2322265.28	279.44
6700485.29	2322274.37	265.92
6700494.75	2322266.6	267.98
6700489.38	2322277.23	265.92
6700492.99	2322275.63	268.97
6700466.49	2322284.49	265.95
6700472.25	2322278.32	271.06
6700469.34	2322278.09	269.52
6700465.45	2322276.38	276.58
6700467.2	2322261.74	282.96
6700458.43	2322273.01	280.5
6700441.77	2322268.21	278.51
6700466.16	2322256.33	281.57
6700462.35	2322248.15	286.19
6700466.11	2322252.53	282.09
6700474.03	2322242.07	286.07
6700486.13	2322240.74	282.02
6700495.78	2322245.92	283.19
6700448.76	2322242.5	286.1
6700448.97	2322252.53	286.13
6700438.69	2322258.61	284.44
6700432.08	2322262.18	279.74
6700419.03	2322272.42	279.18
6700433.38	2322230.5	288.98
6700476.23	2322305.55	265.53
6700477.64	2322310.04	262.08
6700457.49	2322319.68	261.88
6700532.55	2322238.45	276.89
6700529.66	2322231.13	277.77
6700537.48	2322233.63	276.33
6700539.72	2322220.36	277.51
6700564.24	2322220.56	273.99
6700555.93	2322223.93	274.33
6700560.75	2322226.83	268.22
6700563.28	2322224.27	273.29
6700565.32	2322227.26	267.3
6700578.77	2322218.57	267.62
6700575.42	2322212.63	273.8
6700578.35	2322205.73	275.95
6700569.49	2322196.98	279.34
6700578.13	2322192.8	280.1
6700575.1	2322191.49	280.3
6700578.37	2322189.44	283.53
6700590.03	2322185.62	280.35
6700573.67	2322186.3	285.26
6700586.01	2322204.84	275.48
6700593.43	2322193.95	277.73
6700589.49	2322207.53	276.35
6700586.24	2322216.39	266.81
6700591.74	2322210.4	267.08
6700596.49	2322208.98	271.47
6700600.36	2322208.41	266.51
6700595.74	2322203.17	274.45
6700605.82	2322199.59	268.05
6700599.64	2322195.75	278.24
6700609.06	2322194.04	275.63
6700613.12	2322189.17	275.87
6700621.39	2322178.06	282.21
6700606.88	2322185.17	279.98
6700601.55	2322172.57	282.74
6700601.8	2322167.53	285.81
6700603.36	2322161	284.85
6700596.85	2322174.6	282.03
6700589.74	2322182.91	284.01
6700627.3	2322151.11	288.4
6700608.81	2322144.5	287.74
6700611.89	2322141.8	288.71
6700607.24	2322143.09	291.65
6700616.12	2322137.17	291.89
6700618.7	2322123	293.42
6700621.41	2322139.99	288.12
6700636.16	2322128.52	290.34
6700636.56	2322135.09	291.23
6700646.63	2322134.22	292.01
6700647.9	2322119.3	292.63
6700645.91	2322115.91	295.63
6700626.19	2322120.42	293.7
6700631.74	2322103.44	297.64
6700621.86	2322110.52	299.02
6700624.15	2322120.24	296.09
6700613.86	2322099.45	300.14
6700626.66	2322075.26	305.64
6700600.47	2322078.24	308.35
6700601.57	2322068.2	307.9
6700619.35	2322052.96	312.69
6700600.61	2322016.99	321.13
6700589	2322014.3	324.76
6700597.33	2322005.11	323.38
6700602.21	2322006.2	324.82
6700606.66	2322008	325.58
6700636.06	2322020.45	318.84
6700627.66	2322034.35	314
6700649.14	2322044.53	310.71
6700650.86	2322041.87	311.41
6700652.68	2322015.65	319.9
6700634.89	2321993.14	327.51
6700649.26	2321986.62	325.74
6700645.49	2321974.77	332.69
6700632.62	2321974.84	332.33
6700638.65	2321969.62	332.82
6700631.51	2321966.4	336.95
6700606.28	2321973.65	331.9
6700619.92	2321995.4	325.72
6700606.94	2322001.61	327.33
6700596.2	2321973.98	332.37
6700601.74	2321973.09	335.19
6700599.73	2321961.55	339.52
6700602.89	2321955.43	340.65
6700634.76	2321962.56	335.43
6700621.32	2321931.53	345.98
6700582.01	2321931.24	346.58
6700578.9	2321932.43	348.55
6700573.69	2321925.61	347.48
6700571.4	2321904.28	352.44
6700611.29	2321892.07	357.29
6700604.68	2321886.93	359.08
6700570.02	2321871.94	359.79
6700523.5	2321872.62	358.22
6700526.36	2321824.19	370.3
6700509.46	2321830.83	368.08
6700495.48	2321854.27	360.96
6700505.11	2321832.45	370.69
6700502.06	2321829.87	368.27
6700460.98	2321824.85	367.41
6700508.82	2321822.28	369.44
6700464.25	2321800.55	374.63
6700479.16	2321773.95	377.99
6700422.13	2321774.5	375.73
6700457.73	2321822.5	367.37
6700452.83	2321827.88	366.38
6700451.66	2321837.89	363.64
6700491.52	2321866.52	358.23
6700476.85	2321860.84	358.64
6700477.73	2321872.19	356.92
6700473.4	2321923.08	346.44
6700500.39	2321882.83	354.43
6700493.3	2321873.82	357.19
6700481.7	2321866.12	360.99
6700506.25	2321870.94	360.14
6700512.48	2321898.97	351.24
6700566.1	2321911.36	352.99
6700516.51	2321922.98	346.87
6700506.59	2321917.55	347.77
6700508.29	2321924.15	347.6
6700492.25	2321933.6	344.1
6700507.13	2321930.93	345.37
6700500.03	2321934.25	344.78
6700483.2	2321940.94	343.15
6700483.42	2321938.86	345.8
6700481.3	2321935.55	343.79
6700477.97	2321949.6	341.6
6700481.39	2321950.33	342.13
6700474.19	2321952.7	343.56
6700474.21	2321961.66	339.21
6700467.04	2321963.12	342.18
6700463.27	2321952.81	341.13
6700478.56	2321968.4	337.98
6700486.75	2321958.58	342.46
6700502.22	2321911.83	349.57
6700501.3	2321907.09	349.62
6700448.23	2321730.6	384.34
6700423.85	2321726.72	384.47
6700441.79	2321717.39	389.23
6700819.04	2322825.27	226.9
6700738.08	2322872.91	226.85
6700824.91	2322876.39	226.86
6700811.52	2322944.44	226.13
6700871.71	2322910.39	226.15
6700868.16	2322889.71	226.16
6700872.65	2322897.64	226.95
6700870.41	2322886.96	231.21
6700874.13	2322892.21	229.76
6700878.33	2322886.12	233
6700883.83	2322898.97	233.46
6700887.75	2322885.44	236.08
6700887.16	2322870.87	235.33
6700872.53	2322872.44	226.05
6700868.15	2322880.92	226.69
6700858.36	2322861.47	226.85
6700869.18	2322860.58	227.28
6700868.04	2322857.56	232.17
6700870.13	2322846.47	232.33
6700872.17	2322849.41	226.24
6700873.32	2322843.44	226.38
6700874.26	2322846.74	228.13
6700886.39	2322850.6	233.22
6700883.91	2322844.02	232.13
6700878.43	2322844.98	229.4
6700873.6	2322832.7	226.38
6700874.26	2322842.27	229.28
6700864.35	2322839.59	226.86
6700869.53	2322831.74	231.33
6700859.38	2322832.79	226.9
6700862.37	2322822.34	226.87
6700870.51	2322809.86	225.96
6700830.37	2322750.57	226.83
6700883.25	2322688.56	226.86
6700873.56	2322724.29	226.85
6700882.01	2322776.89	226.08
6700890.9	2322764.27	226.12
6700894.01	2322760.63	230.68
6700895.78	2322758.87	226.07
6700921.17	2322736.85	226.39
6700906.27	2322751.36	226.03
6700923.08	2322749.01	229.76
6700922.24	2322757.86	231.65
6700927.95	2322751.14	234.53
6700930.9	2322752.14	233.56
6700929.63	2322737.73	229
6700943.89	2322730.66	234.05
6700941.32	2322756.96	243.51
6700936.43	2322768.38	242.16
6700970.93	2322776.02	255.02
6700969.7	2322723.02	241.7
6700990.53	2322731.63	248.42
6701005.09	2322749.1	256.81
6701023.08	2322720.78	251.95
6701011.49	2322708.1	247.38
6700982.94	2322722.51	245.47
6700974.98	2322711.05	241.36
6700984.4	2322703.77	243.13
6700976.01	2322700.52	234.88
6700963.16	2322704.17	231.68
6700968.64	2322710.66	239.37
6700962.96	2322717.39	239.59
6700963.05	2322711.93	234.3
6700957.05	2322720.55	236.85
6700957.5	2322710.1	233.72
6700952.57	2322705.48	229.91
6700944.02	2322701.09	227.66
6700942.91	2322702.63	229.25
6700939.45	2322710.69	227.83
6700927.15	2322719.06	226.21
6700931.03	2322717.33	227.05
6700950.99	2322719.33	231.52
6700932.13	2322728.12	228.73
6700930.13	2322721.44	228.05
6700931.45	2322726.3	232.4
6700927.99	2322723.72	226.24
6700928.24	2322729.4	229.53
6700929.04	2322720.07	225.97
6700956.8	2322677.01	225.94
6700896.39	2322653.23	226.93
6700762.77	2322367.63	227.04
6700985.11	2322533.1	226.94
6700942.6	2322630.73	227.06
6700958.49	2322674.04	231.02
6700965.34	2322667.79	226.25
6700977.91	2322655.58	226.05
6700975.73	2322658.79	226.38
6700969.82	2322664	226.35
6700982	2322659.02	228.4
6700968.78	2322672.88	228.52
6700984.62	2322687.85	236.34
6700997.33	2322662.92	231.19
6700998.2	2322676.21	234.64
6701004.42	2322675.9	239.89
6700990.62	2322688.69	236.98
6700997.13	2322691.48	242.7
6701016.74	2322697.8	245.92
6701008.01	2322676.81	241.17
6701007.48	2322669.17	233.66
6701000.14	2322661.69	233.32
6701007.14	2322649.54	230.72
6700990.79	2322658.69	232.16
6700984.37	2322654.19	227.42
6700999.93	2322641.87	228.57
6701000.33	2322609.95	226.2
6701003.86	2322638.52	232.18
6701009.04	2322633.12	230.02
6701011.52	2322637.36	231.11
6701011.43	2322621	230.72
6701025.82	2322619.18	233.19
6701015.1	2322616.35	232.67
6701022.1	2322607.34	231.31
6701017.05	2322587.65	227.13
6701018.27	2322579.02	226.24
6701019.11	2322583.21	226.78
6701020.02	2322584.25	229.63
6701036.33	2322598.49	235.76
6701028.04	2322578.09	228.3
6701041.85	2322590.93	235.33
6701038.68	2322574.86	229.8
6701034.27	2322561.06	226.13
6701040.48	2322563.33	228.6
6701049.49	2322568.95	233.57
6701053.63	2322549	227.89
6701045.27	2322547.69	226.23
6701039.56	2322556.14	225.99
6701041.79	2322551.21	230.76
6701050.53	2322523.31	226.85
6701054.54	2322536.55	231.69
6701056.33	2322534.58	231.9
6701063.05	2322532.86	226.26
6701054.86	2322541.58	226.17
6701067.96	2322531.91	228.91
6701066.63	2322527.37	226.85
6701071.44	2322526.95	227.68
6701074.16	2322533.31	229.88
6701068.3	2322557.63	230.93
6701060.58	2322569.7	233.45
6701070.57	2322563.21	233.59
6701069.53	2322568.34	238.89
6701064.17	2322576	238.62
6701056.77	2322579.32	238.82
6701050.38	2322594.09	241.42
6701089.85	2322607.3	250.21
6701076.44	2322568.54	241.14
6701097.84	2322604.21	248.99
6701112.16	2322577.16	248.73
6701080.92	2322564.19	240.8
6701079.26	2322556.37	235.43
6701088.44	2322549.22	240.03
6701085.58	2322546.59	239.46
6701081.47	2322544.8	236.23
6701089.21	2322534.54	233.82
6701087.19	2322519.03	231.12
6701073.96	2322520.06	226.33
6701080.76	2322510.76	226.24
6701072.81	2322519.4	229.71
6701025.23	2322480.21	226.88
6700827.26	2322279.34	227.04
6700862.48	2322276.37	226.96
6700820.73	2322235.43	226.33
6700799.54	2322242.58	226.3
6700773.83	2322255.46	226.3
6700731.34	2322277.82	226.24
6700737.04	2322266.93	230.73
6700729	2322263.5	231.01
6700721.27	2322272.98	231.89
6700723.95	2322279.18	226.78
6700722.44	2322278.48	228.75
6700718.49	2322281.49	226.87
6700715.05	2322279.77	231.58
6700701.56	2322282.97	231.52
6700712.01	2322264.35	232.03
6700700.46	2322274.44	232.33
6700699.54	2322279.74	230.42
6700696.76	2322283.19	231.44
6700691.63	2322281.94	234.4
6700683.84	2322287.09	232.47
6700695.83	2322287.11	230.71
6700697.46	2322287.62	230.35
6700694.36	2322289.37	232.4
6700698.66	2322291.82	230.11
6700694.24	2322295.04	226.96
6700702.72	2322290.2	226.61
6700681.41	2322312.76	226.01
6700685.28	2322300.76	231.28
6700682.17	2322304.86	227.63
6700676.83	2322307.43	230.27
6700674.25	2322310.91	227.54
6700658.6	2322321.12	226.05
6700654.03	2322325.24	226.02
6700638.25	2322325.75	226.16
6700575.59	2322349.3	229.61
6700567.52	2322353.76	233.04
6700570.7	2322348.19	225.17
6700564.95	2322352.92	226.28
6700534.85	2322366.38	226.29
6700548.43	2322358.3	226.09
6700536.13	2322363.2	225.95
6700533	2322359.8	231.74
6700543.09	2322357.5	227.25
6700543.06	2322349.07	233.16
6700530.02	2322346.39	233.28
6700525.57	2322355.14	231.75
6700520.97	2322363.7	232.57
6700512.15	2322356.8	233.22
6700511.44	2322365.34	230.79
6700517.8	2322371.53	230.06
6700511.23	2322372.08	227.65
6700511.15	2322370.22	231.28
6700501.34	2322374.43	232.58
6700496.21	2322372.79	230.75
6700499.03	2322377.56	229.37
6700505.4	2322383.11	226
6700506.92	2322378.44	226.58
6700512.72	2322374.08	227.07
6700522.6	2322368.14	231.07
6700529.8	2322364.63	226.68
6700465.01	2322409.67	226.58
6700453.49	2322419.4	226.14
6700446.82	2322425.36	231.67
6700445.88	2322424.95	226.08
6700432.28	2322427.69	231.58
6700429.1	2322427.72	231.29
6700417.43	2322413.59	233.73
6700426.39	2322414.79	232.51
6700417.92	2322406.16	239.51
6700413.93	2322411.81	240.15
6700409.31	2322412.69	244.7
6700414.06	2322415.04	234.51
6700412.33	2322422.59	233.19
6700402.86	2322419.32	240.52
6700407.66	2322411.77	241.4
6700398.97	2322415.26	241.29
6700401.98	2322420.15	242.11
6700401.23	2322423.09	236.94
6700405.8	2322423.86	235.02
6700405.25	2322425.83	237.83
6700401.42	2322430.42	233.37
6700391.46	2322430.83	233.2
6700397.5	2322425.04	239.06
6700394.83	2322423.03	237.81
6700387.82	2322416.96	242.9
6700389.36	2322421.62	240.82
6700388.77	2322427.24	234.93
6700390.74	2322427.94	242.07
6700379.25	2322433.81	235.28
6700377.13	2322441.65	233.92
6700379.47	2322452.51	233.08
6700371.77	2322445.08	234.23
6700375.39	2322455.95	232.71
6700378.22	2322459.56	231.86
6700376.69	2322459.76	229.37
6700368.36	2322455.38	231.98
6700362.58	2322439.64	238.47
6700353.99	2322441.39	240.13
6700356.54	2322404.06	261.04
6700329.98	2322394.94	264.55
6700360.74	2322403.82	261.27
6700372.42	2322424.02	244.86
6700384.19	2322395.42	256.98
6700378.31	2322388.94	261.43
6700395.89	2322377.65	253.07
6700386.5	2322373.95	261.38
6700365.93	2322361.25	260.36
6700332.8	2322372.36	260.07
6700356.27	2322346.09	265.71
6700358.39	2322346.03	265.8
6700346.38	2322330.43	264.99
6700353.57	2322322.82	265.61
6700342.25	2322326.16	274.52
6700342.16	2322333	264.86
6700337.01	2322322.62	278.28
6700349.07	2322314.94	273.25
6700371.01	2322316.81	268.72
6700370.55	2322326.72	265.46
6700374.14	2322321.08	269.54
6700377.36	2322321.26	265.64
6700374.42	2322316.15	266.5
6700378.25	2322317.24	268.05
6700377.82	2322309.29	268.34
6700373.43	2322302.72	274.27
6700377.57	2322307.28	271.56
6700380.38	2322303.67	273.01
6700384.06	2322304.56	269.39
6700381.33	2322301.62	273.11
6700383.67	2322312.41	264.94
6700384.8	2322319.07	268.55
6700390.75	2322310.84	266.38
6700390.06	2322317.91	266.25
6700387.2	2322319.96	268.46
6700388.67	2322320.95	265.52
6700386.1	2322325.08	267.46
6700393.05	2322319.2	265.61
6700392.42	2322335.23	263.83
6700382.92	2322324.74	265.59
6700375.18	2322344.27	265.65
6700380.16	2322348.24	261.95
6700386.19	2322372.39	260.85
6700396.76	2322363.38	260.41
6700414.32	2322368.75	261.37
6700403.55	2322378.07	256.82
6700396.84	2322392.58	251.19
6700403.75	2322395.92	251.23
6700401.71	2322400.27	247.31
6700409.02	2322400.29	247.87
6700411.38	2322377.35	256.67
6700430.68	2322381.97	246.71
6700432.69	2322370.98	250.55
6700426.56	2322363	259.95
6700428.76	2322361.94	258.68
6700445.76	2322383.04	240.9
6700466.03	2322367.62	242.44
6700451.4	2322387.74	236.52
6700464.78	2322385.89	234.63
6700464.75	2322393.23	231.45
6700456.61	2322399.52	232.53
6700464.28	2322399.86	232.5
6700468.32	2322402.86	226.14
6700463.83	2322406.88	230.05
6700454.29	2322401.13	231.93
6700449.03	2322414.1	232.6
6700462.82	2322409.66	226.37
6700464.9	2322406.58	226.01
6700481.96	2322390.94	226.43
6700473.62	2322382.8	232.27
6700484.44	2322387.23	230.45
6700485.7	2322388.62	226.58
6700490.93	2322378.29	229.65
6700485.01	2322360.9	237.61
6700478.21	2322375.46	233.99
6700478.58	2322372.84	235.13
6700473.36	2322376.51	238.06
6700470.18	2322376.56	236.81
6700448.04	2322419.25	226.78
6700440.46	2322418.46	233.36
6700438.01	2322416.87	231.11
6700443.64	2322406	231.9
6700435.72	2322403.16	235.93
6700429.94	2322401.87	236.99
6700431.41	2322401.52	241.46
6700431.81	2322397.89	238.44
6700440.05	2322386.81	240.78
6700443.85	2322392.7	234.04
6700444.63	2322389.57	239.61
6700442.92	2322386.91	236.25
6700448.34	2322387.02	238.07
6700378.78	2322324.47	267.8
6700393.16	2322306.6	269.89
6700388.32	2322307.14	270.94
6700370.67	2322433.54	242.6
6700371.92	2322437.52	237.86
6700376.37	2322438.67	239.35
6700528.53	2322338.28	238.19
6700529.69	2322331.22	246.3
6700535.18	2322339.48	235.83
6700542.56	2322330.51	238.44
6700541.35	2322322.23	249.16
6700525.05	2322317.56	259.22
6700544.13	2322319.65	247.9
6700549.57	2322304.14	258.9
6700556.32	2322296.38	259.98
6700564.3	2322310.54	246.9
6700570.33	2322310.08	242.06
6700573.95	2322319.92	234.76
6700568.5	2322321.57	235.04
6700560.36	2322319.28	237.47
6700554.22	2322331.3	234.31
6700564.1	2322333.32	232.98
6700580.36	2322326.96	232.38
6700576.63	2322337.61	230.64
6700581.18	2322333.68	233.29
6700582.58	2322333.72	231.72
6700582.89	2322338.1	226.86
6700592.19	2322333.35	226.39
6700581.46	2322344.67	226.19
6700612.08	2322327.63	226.13
6700606.11	2322325.26	227.51
6700612.23	2322318.64	231.4
6700604.74	2322303.86	233.89
6700614.77	2322307.19	232.52
6700613.49	2322304.38	237.42
6700605.91	2322300.23	237.67
6700610.79	2322294.65	239.43
6700607.28	2322289.59	244.07
6700599.91	2322296.26	243.26
6700599.97	2322298.25	238.42
6700593.13	2322299.79	239.5
6700585.58	2322299.2	245.15
6700587.7	2322308.41	236.35
6700582.26	2322309.78	236
6700577.17	2322305.97	244.98
6700574.21	2322285.29	259.8
6700586.45	2322279.17	259.96
6700558.38	2322265.76	261.92
6700572.8	2322285.18	259.94
6700586.51	2322252.46	261.53
6700562.09	2322252.81	266.95
6700587.05	2322240.06	267.17
6700580.97	2322222.95	266.29
6700598.76	2322235.46	267.06
6700600.69	2322227.97	268.48
6700590.14	2322217.35	266.6
6700607.05	2322224	267.66
6700616.86	2322222.97	265.64
6700600.83	2322243.67	261.45
6700615.01	2322241.07	260.87
6700635.06	2322229.1	260.85
6700628.97	2322218.11	264.73
6700660.94	2322222.94	260.51
6700649.68	2322238.88	261.27
6700661.8	2322238	264.74
6700669.95	2322235.59	264.54
6700677.97	2322243.24	258.15
6700681.02	2322235.43	264.26
6700688.02	2322250.09	250.32
6700679.64	2322248.34	252.04
6700671.84	2322257.93	247.36
6700686.46	2322261.33	245.89
6700692.04	2322252.39	250.64
6700690.87	2322260.71	242.79
6700693.56	2322252.38	247.8
6700695.14	2322247.97	249.12
6700714.72	2322258.17	236.81
6700715.91	2322245.57	245.38
6700695.05	2322238.92	254.57
6700697.19	2322238.22	256.53
6700696.13	2322224.49	265.97
6700675.06	2322229.18	267.03
6700682.87	2322209.77	261.58
6700691.33	2322213.97	267.82
6700698.56	2322197.7	261.53
6700697.29	2322212.85	268.78
6700699.21	2322208.54	268.34
6700707.69	2322194.26	263.06
6700706.47	2322192.92	262.52
6700688.38	2322181.56	262.31
6700717.12	2322180.97	260.92
6700716.96	2322194.38	269.35
6700722.48	2322188.67	268
6700730.19	2322193.57	268.06
6700724.04	2322205.03	264.68
6700717.08	2322203.67	266.01
6700729.6	2322215.64	253.15
6700738.67	2322205.45	255.73
6700739.37	2322223.55	247.51
6700763.17	2322226.99	240.57
6700749.98	2322195.64	258.01
6700740.86	2322186.21	267.89
6700729.8	2322178.1	262.43
6700738.67	2322178.47	267.61
6700752.62	2322186.48	263.8
6700749.26	2322188.48	264.07
6700759.97	2322197.79	254.5
6700761.82	2322183.39	263.95
6700769.84	2322196.29	252.46
6700786.12	2322178.85	255.11
6700773.18	2322163.67	268.31
6700748.61	2322167.27	265.19
6700748.35	2322161.01	261.89
6700729.87	2322153.2	261.95
6700734.71	2322143.8	263.71
6700723.87	2322150.23	263.49
6700716.26	2322167.09	261.5
6700713.66	2322147.54	268.49
6700703.29	2322166.75	262.55
6700694.11	2322161.26	268.27
6700682.58	2322170.17	267.98
6700679.71	2322148.43	267.48
6700672.59	2322153.7	267.61
6700677	2322141.28	278.57
6700659.16	2322144.17	286.8
6700641.57	2322160.85	283.29
6700649.15	2322172.46	266.72
6700644.51	2322173.23	268.13
6700640.11	2322160.12	283.22
6700638.79	2322167.65	279.77
6700634.17	2322166.96	283.4
6700637.02	2322151.1	285.86
6700625.31	2322189.38	266.91
6700621.25	2322187.29	271.2
6700620.72	2322193.32	267.05
6700624.79	2322193.76	267.57
6700650.07	2322195.13	267.44
6700640.51	2322203.87	267.06
6700653.57	2322201.15	267.59
6700649.97	2322206.33	262.75
6700659.39	2322199.47	262.47
6700678.63	2322205.74	260.99
6700662.95	2322196.79	262.67
6700651.93	2322191.25	268.39
6700647.01	2322138.19	288.4
6700671.44	2322129.81	291.78
6700678.79	2322128.2	284.78
6700681.17	2322138.57	274.99
6700681.49	2322142.83	270.32
6700688.24	2322146.4	268.24
6700691.55	2322131.26	274.79
6700699.94	2322134.6	268.19
6700697	2322123.34	276.88
6700710.03	2322127.2	267.47
6700713.99	2322118.53	267.87
6700707.26	2322107.43	289.02
6700712.8	2322107.95	282.31
6700703.84	2322101.6	295.75
6700716.86	2322088.99	298.46
6700721.07	2322103.49	281.34
6700731.25	2322094.94	282.57
6700723.52	2322081.97	298.01
6700701.16	2322081.95	297.48
6700719.86	2322066.85	298.41
6700711.98	2322062.94	303.47
6700693.11	2322073.69	302.75
6700689.8	2322080.42	301.97
6700689.77	2322072.41	301.33
6700677.16	2322074.58	303.21
6700686.65	2322068.22	305
6700673.08	2322049.64	307.92
6700661.66	2322053.98	307.88
6700653.11	2322057.04	307.52
6700658.9	2322091.68	299.32
6700675.75	2322089.69	299.15
6700674.43	2322093.56	301.48
6700677.85	2322090.99	299.06
6700677.42	2322098.63	295.77
6700692.85	2322091.16	296.42
6700696.03	2322102.5	296.67
6700698.25	2322110.81	292.14
6700690.55	2322113.87	294.47
6700689.41	2322122.42	287.68
6700679.17	2322113.95	296.02
6700679.4	2322122.41	293.62
6700667.91	2322107.13	294.78
6700658.04	2322104.83	298.61
6700665.91	2322101.61	299.58
6700671.47	2322095.78	298.77
6700655.26	2322100.69	300.91
6700650.77	2322103.68	297.11
6700702.52	2322110.25	287.14
6700691.12	2322126.41	278.84
6700692.35	2322127.32	282.63
6700659.96	2322051.73	310.74
6700670.01	2322044.92	311.49
6700662.23	2322020.38	315.18
6700677.61	2322023.39	314.51
6700662.17	2322017.71	315.69
6700669.18	2322006.28	317.19
6700686.07	2322018.5	317.27
6700689.12	2322019.59	313.78
6700681.16	2322045.97	307.96
6700708.14	2322023.32	309.04
6700695.99	2322001.34	315.6
6700719.02	2322007.15	314.61
6700710.4	2321976.92	319.71
6700723.04	2321973.81	318.5
6700726.72	2321966.07	319.84
6700740.39	2321963.69	316.99
6700731.44	2321970.76	319.43
6700730.16	2321974.67	316.55
6700734.74	2321991.15	312.48
6700742.31	2321987.27	314.02
6700745.54	2321977.29	313.61
6700754.05	2321986	310.7
6700755.38	2321961.93	315.81
6700749.37	2321959.03	318.44
6700736.34	2321955.42	320.8
6700735.16	2321961.26	322.12
6700721.19	2321963.57	324.31
6700715.63	2321966.17	321.06
6700714.57	2321950.65	327.42
6700710.01	2321969.1	321.6
6700702.79	2321952.51	331.36
6700691.9	2321955.53	328.74
6700698.98	2321930.8	338.25
6700683.35	2321938.3	339.17
6700685.01	2321956.16	332.04
6700666.36	2321974.31	327.12
6700695.91	2321970.6	326
6700690.43	2321994.58	318.76
6700647.71	2321970.4	332.71
6700647.88	2321966.81	334.72
6700662.06	2321946.24	339.19
6700649.56	2321937.33	340.67
6700633.19	2321935.01	345.51
6700649.8	2321922.35	347.32
6700673.52	2321928.21	341.92
6700648.69	2321918.78	348.95
6700633.88	2321916.07	348.2
6700645.7	2321911.1	349.21
6700641.55	2321905.52	353.41
6700621.74	2321895.29	353.76
6700624.93	2321880.21	359.86
6700671.26	2321878.11	355.62
6700675.05	2321873.28	356.68
6700681.35	2321874.92	355.66
6700679.44	2321869.93	359.29
6700682.05	2321862.27	358.42
6700695.24	2321861.51	356.89
6700695.9	2321878.87	354.56
6700695.84	2321886.28	350.28
6700684.14	2321903.79	348.79
6700695.96	2321903.07	348.02
6700687.92	2321912.02	343.73
6700702.46	2321915.14	340.44
6700705.92	2321893.33	347.15
6700711.36	2321901.72	345.65
6700711.41	2321908.53	341.64
6700721.57	2321903.38	341.87
6700724.33	2321911.95	340.52
6700750.84	2321907.84	336.7
6700750.49	2321891.35	341.54
6700756.84	2321898.38	338.83
6700758.98	2321901.6	334.79
6700764.67	2321922.23	328.52
6700776.32	2321926.41	323.51
6700764.46	2321927.79	323.91
6700765.12	2321936.96	321.29
6700752.77	2321934.13	326.94
6700750.33	2321936.41	324.27
6700770.54	2321940.11	320.11
6700782.2	2321931.17	321.26
6700780.86	2321933.06	322.34
6700784.64	2321937.13	317.02
6700787.35	2321935.86	316.98
6700802.02	2321929.4	318.51
6700819.63	2321957.84	309.6
6700821.6	2321928.65	313.1
6700840.31	2321935.83	308.02
6700835.55	2321921.02	312.15
6700829.28	2321917.53	315.12
6700821.23	2321912.86	317.65
6700833.21	2321909.39	315.49
6700827.18	2321903.27	318.69
6700818.75	2321914.34	317.18
6700820.11	2321916.61	318.98
6700808.87	2321920.13	317.53
6700804.8	2321899.96	321.55
6700803.64	2321915.75	318.87
6700788.32	2321914.97	321.57
6700790.44	2321898.79	325.52
6700781.39	2321900.15	328.44
6700779.91	2321902.8	327.06
6700760.41	2321893.82	338.07
6700777.29	2321887.88	333
6700774	2321881.49	336.44
6700763.5	2321878.63	338.11
6700748.64	2321869.87	346.89
6700736.57	2321880.18	348.6
6700730.37	2321875.2	351.54
6700727.36	2321876.63	348.86
6700727.77	2321879.58	348.14
6700713.54	2321887.45	350.13
6700701.06	2321880.35	351.02
6700712.14	2321891.77	346.93
6700731.8	2321857.03	355.06
6700724.64	2321847.08	356.18
6700731.26	2321853.38	353.71
6700738.11	2321852.99	355.48
6700733.96	2321865.33	350.95
6700749.06	2321844.14	353.79
6700722.89	2321823.45	361.69
6700774.94	2321831.62	351.23
6700751.76	2321803.59	362.21
6700725.18	2321776.92	370.76
6700753	2321779.83	364.03
6700762.22	2321742.89	372.26
6700728.49	2321722.83	379.14
6700697.05	2321746.92	379.95
6700717.21	2321714.75	382
6700693.1	2321745.92	381.16
6700691.33	2321754.8	379.78
6700687.43	2321754.16	383.81
6700686.99	2321758.58	379.77
6700693.23	2321780.78	376.24
6700710.49	2321823.03	366.45
6700683.61	2321801.12	371.75
6700704.05	2321833.66	364.4
6700671.59	2321825.74	368.12
6700685.94	2321841.53	361.74
6700703.36	2321837.93	362.95
6700685.37	2321856.42	361.38
6700681.15	2321843.74	364.51
6700626.1	2321824.47	371.6
6700651.75	2321804.78	373.59
6700629.16	2321812.92	373.83
6700612.49	2321818.17	374.29
6700600.33	2321820.74	373.24
6700599.48	2321815.26	376.86
6700595.75	2321811.06	375.24
6700574.44	2321827.98	371.66
6700578.79	2321796.05	378.54
6700548.25	2321805.95	374.59
6700539.45	2321799.86	376.03
6700540.53	2321799.85	378.51
6700540.63	2321797.41	376.69
6700575.08	2321772.5	383.04
6700524.02	2321774.77	380.17
6700561.03	2321748.85	389.18
6700564.17	2321749.19	386.99
6700578.13	2321726.03	391.56
6700581.76	2321757.58	386.05
6700596.21	2321738.47	388.98
6700597.08	2321731.48	390.65
6700621.97	2321735.6	390.28
6700625.78	2321726.27	390.02
6700630.53	2321731.85	388.36
6700623.15	2321775.59	380.97
6700593.7	2321759.15	385.63
6700585.32	2321772.28	382.67
6700605.87	2321808.78	375.37
6700601.78	2321806.19	377.95
6700598.26	2321806.73	375.96
6700578.99	2321791.57	381.8
6700589.74	2321760.09	387.97
6700669.64	2321750.04	382.59
6700635.93	2321724.83	391.32
6700675.3	2321729.73	385.78
6700671.47	2321687.97	391.65
6700621.87	2321676.23	398.13
6700678.27	2321672.27	393.57
6700669.21	2321644.01	397.89
6700645.42	2321631.67	403.6
6700675.63	2321623.82	399.74
6700635.04	2321614.93	404.63
6700622.44	2321625.77	404.43
6700629.7	2321612.2	405.42
6700620.67	2321625.36	406.63
6700604.68	2321672	398.92
6700606.98	2321674.67	400.93
6700606.95	2321683.42	396.98
6700603.09	2321724.08	393.5
6700587.24	2321702.44	394.53
6700597.2	2321685.8	396.86
6700582.07	2321693.39	399.41
6700580.25	2321698.04	395.66
6700575.74	2321691.27	396.81
6700525.61	2321725.34	389.65
6700523.85	2321673.36	398.15
6700561.89	2321670.14	400.49
6700546.35	2321656.57	401.69
6700547.2	2321650.79	402.41
6700445.54	2321718.27	386.77
6700623.9	2321607.88	406.26
6700630.88	2321584.42	410.2
6700638.46	2321590.76	406.49
6700632.08	2321612.84	407.39
6700644.36	2321588.26	406.52
6700645.1	2321576.59	409.61
6700641.37	2321579.72	408.32
6700772.69	2322961.64	231.15
6700770.1	2322949.04	230.66
6700780.13	2322942.95	226.01
6700784.72	2322960.47	231.59
6700793.41	2322949.06	227.74
6700791.75	2322963.15	236.73
6700800.77	2322959.47	234.31
6700805.02	2322949.06	231.59
6700817.05	2322961.44	229.77
6700812.61	2322967.16	233.59
6700820.38	2322964.97	234.78
6700822.82	2322966.32	230.35
6700839.43	2322959.48	226.33
6700811.86	2322948.92	228.46
6700829.71	2322967.11	231.08
6700834.42	2322966.43	226.59
6700844.75	2322967.09	226.24
6700836.2	2322970.59	226.79
6700842.79	2322973.9	226.27
6700841.3	2322979.35	232.67
6700829.74	2322978.88	230.55
6700827.33	2322989.7	234.89
6700838.74	2322989.75	230.7
6700847.84	2322980.71	230.21
6700844.59	2322978.18	228.71
6700852	2322981.69	226.37
6700846.68	2322976.21	225.67
6700846.61	2322970.34	226.39
6700851.82	2322972.19	230.91
6700853.07	2322960.74	232.51
6700859.46	2322968.4	231.91
6700858.77	2322961.8	227.2
6700857.66	2322958.13	227.2
6700854.39	2322957.16	227.42
6700873.17	2322950.92	227.41
6700871.69	2322955.98	231.1
6700879.5	2322961.27	231.96
6700888.5	2322962.19	228.81
6700889.77	2322947.37	226.99
6700878.67	2322930.76	225.97
6700885.25	2322929.82	226.19
6700880.9	2322916.34	226.85
6700875.89	2322918.5	226.14
6700875.06	2322912.91	231.77
6700877.63	2322904.38	233.53
6700880.94	2322910.85	233.28
6700884.93	2322910.07	230.9
6700892.1	2322901.35	235.92
6700894.87	2322903.29	239.4
6700888.91	2322915.37	232.89
6700901.42	2322925.11	238.9
6700923.82	2322924.21	247.24
6700913.01	2322929.29	244.46
6700910.1	2322929.26	240.52
6700900.66	2322925.5	237.24
6700905.73	2322943.08	233.2
6700885.09	2322925	232.5
6700909.5	2322943.83	239.63
6700915.18	2322946.25	241.11
6700900.03	2322948.89	231.42
6700895.06	2322964.77	233.19
6700904.26	2322958.36	236.61
6700899.65	2322967.06	238.94
6700884.91	2322966.7	229.91
6700893.71	2322974.27	235.6
6700880.1	2322973.3	235.44
6700883.48	2322974.1	232.2
6700882.76	2322977.91	237.17
6700886.3	2322979.35	233.14
6700889.31	2322976.27	232.18
6700890.62	2322978.76	236.42
6700894.02	2322985.32	236.09
6700885.6	2322993.91	233.68
6700899.68	2322994.37	242.42
6700904.42	2322992.03	249.19
6700900.26	2322976.48	241.56
6700910.29	2322971.35	244.62
6700920.23	2322972.91	252.74
6700907.88	2322956.26	241.02
6700934.23	2322952.74	255.96
6700931.27	2322933.59	249.09
6700916.88	2322929.32	243.21
6700934.05	2322933.36	249.63
6700940.72	2322925.57	254.47
6700937.68	2322938.05	255.04
6700945.5	2322940.09	257.39
6700975.08	2322930.73	260.76
6700974.32	2322964.86	256.95
6700991.65	2322948.97	259.94
6701001.59	2322965.16	273.99
6700976.13	2322974.73	264.34
6700981.66	2322981.9	269.13
6700966.08	2322975.88	255.69
6700962.18	2322991.88	259.65
6700974.82	2323000.78	264.76
6700995.73	2323006.36	274.01
6701007.21	2322970.59	276.02
6701022.63	2323001.94	283.16
6701041.31	2322968.62	284.21
6701018.82	2322955.91	279.58
6701007.61	2322943.46	263.93
6701018.88	2322951.03	276.89
6701010.34	2322935.6	262.56
6700995.43	2322916.7	263.02
6701005.6	2322905.68	265.06
6701037.05	2322918.35	264.94
6701028.82	2322891.65	267.53
6701000.57	2322897.14	273.45
6701001.89	2322906.11	269.02
6700997.41	2322909.94	266.64
6700993.31	2322905.54	271.22
6700988.82	2322914.07	264.5
6700971.66	2322920.11	264.87
6700988.82	2322905.43	271.12
6700970.7	2322885.02	274.34
6700992.93	2322889.13	275.12
6700988.79	2322870.38	277.47
6700961.09	2322877.53	270.8
6700933.31	2322890.67	259.74
6700944.08	2322914.96	259.17
6700908.25	2322889.48	249.53
6700923.06	2322866.59	254.85
6700905.02	2322851.69	246.77
6700901.65	2322882.35	246.51
6700890.87	2322869.02	240.13
6700880.96	2322854.66	231.26
6700875.2	2322867.8	230.59
6700872.49	2322856.2	228.58
6700903.37	2322849.35	243.33
6700890.63	2322831.8	233.49
6700902.28	2322830	242.42
6700891.66	2322812.76	234.48
6700880.29	2322830.36	231.98
6700873.39	2322824.69	226.37
6700873.27	2322811.09	226.75
6700870.3	2322812.68	232.12
6700892.61	2322804.15	233.23
6700880.15	2322789.99	228.89
6700873.19	2322788.21	225.95
6700878.52	2322789.3	230.75
6700874.38	2322785.86	226.03
6700881.01	2322788.44	228.57
6700895.93	2322779.46	232.76
6700897.73	2322774.6	230.74
6700900.96	2322782.78	232.25
6700902.23	2322789.19	237.12
6700900.57	2322793.3	234.73
6700899.73	2322803.38	239.17
6700893.48	2322811.68	235.6
6700927.27	2322823.01	252.06
6700914.62	2322793.83	243.41
6700936.45	2322798.6	249.02
6700935.4	2322793.47	247.91
6700919.95	2322776.72	240.58
6700913.79	2322776.46	235.63
6700905.67	2322789.21	235.74
6700911.27	2322770.44	234.09
6700904.59	2322773	234.01
6700904.01	2322769.12	230.87
6700900.23	2322763	228.75
6700907.09	2322766.38	232.77
6700898.42	2322757.59	226.01
6700898.42	2322759.76	231.69
6700897.1	2322759.32	230.33
6700920.34	2322762.27	231.39
6700912.21	2322768.22	232.33
6700914.61	2322768.23	235.01
6700925.77	2322766.92	238.75
6700933.11	2322776.62	245.54
6700945.79	2322796.92	254.07
6700955.86	2322801.61	255.4
6700968.09	2322802.44	261.94
6700990.01	2322809.75	268.5
6701001.49	2322800.38	267.88
6701025.78	2322820.86	271.3
6701023.44	2322765.7	262
6701037.02	2322723.58	253.79
6701068.15	2322731.57	254.66
6701039.81	2322715.64	254.91
6701025.07	2322708.52	249.44
6701024.27	2322709.01	250.07
6701027.33	2322706.19	248.84
6701018.11	2322704.02	249.79
6701014.46	2322699.23	248.54
6701020.96	2322696.79	248.49
6701024.6	2322692.06	245.5
6701023.18	2322695.61	246.12
6701047.67	2322689.3	250.19
6701047.79	2322680.21	246.06
6701037.67	2322678.21	245.94
6701025.41	2322672.88	240.67
6701016.32	2322670.4	239.98
6701022.39	2322662.52	235.09
6701011.13	2322666.94	234.12
6701021.05	2322646.3	233.2
6701031.49	2322647.77	235.77
6701025.27	2322636.27	234.24
6701021.57	2322635.84	235.54
6701012.13	2322641.12	231.26
6701007.52	2322642.69	233.08
6701027.71	2322627.78	235.09
6701032.12	2322638.9	239.59
6701040.93	2322630.03	241.3
6701041.33	2322630.2	243.78
6701041.15	2322624.42	242.18
6701047.59	2322636.73	243.01
6701058.08	2322637.53	245.66
6701075.25	2322629.03	248.46
6701069.12	2322643.52	250.67
6701079.98	2322644.96	249.91
6701102.32	2322621.66	252.08
6701094.26	2322639.99	254.87
6701093.08	2322653.75	253.91
6701088.92	2322656.94	256.61
6701069.13	2322649.16	248.46
6701067.39	2322668.3	249.12
6701052.76	2322648.24	246.07
6701045.25	2322669.56	243.55
6701060.77	2322684.66	249.45
6701071.72	2322681.5	254.35
6701071.45	2322685.64	252.6
6701057.94	2322688.55	249.1
6701065.71	2322705.97	254.23
6701072.94	2322712.91	253.48
6701071.13	2322715.83	253.85
6701083.54	2322715.29	255.74
6701083.8	2322718.71	256.13
6701124.69	2322723.39	265.47
6701123.53	2322740.04	264.22
6701091.96	2322760.15	257.34
6701122.66	2322748.04	263.81
6701116.6	2322770.68	261.69
6701136.72	2322779.78	267.06
6701118.73	2322797.38	264.09
6701133.01	2322801.64	267.52
6701143.44	2322792.8	269.57
6701162.02	2322775.22	272.85
6701162.27	2322785.93	275.38
6701164.12	2322783.18	277.58
6701166.07	2322783.62	276.31
6701176.48	2322770.75	279.32
6701168.46	2322766.84	273.4
6701159.55	2322750.74	271.38
6701150.27	2322746.77	269.63
6701175.87	2322725.82	275.07
6701170.49	2322709.53	274.62
6701173.97	2322708.31	277.77
6701182.69	2322710.21	275.95
6701195.49	2322728.76	280.16
6701221.11	2322723.05	281.11
6701231.07	2322760.17	280.06
6701257.41	2322725.47	280.81
6701224.12	2322677.3	279.68
6701265.39	2322717.7	281.41
6701261.41	2322648.66	281.63
6701226.58	2322625.62	276.28
6701249.47	2322614.64	276.08
6701247	2322608.72	275.12
6701208.84	2322615.87	276.21
6701201	2322637.52	278.07
6701170.89	2322624.77	272.33
6701174.44	2322598.73	270.23
6701176.58	2322585.43	268.75
6701204.96	2322564.15	264.89
6701221.56	2322566.36	267.43
6701212.71	2322558.31	266.42
6701200.75	2322540.91	256.68
6701209.59	2322536.33	259.49
6701203.36	2322527.05	251.31
6701173.05	2322540.7	250.83
6701152.46	2322492.18	238.82
6701172.01	2322479.17	238.51
6701177.42	2322478.59	241.13
6701173.89	2322477.02	240.78
6701177.37	2322467.04	238.02
6701179.91	2322464.04	234.7
6701174.64	2322458.55	232.27
6701171.22	2322467.8	232.74
6701173.06	2322471.07	235.06
6701164.96	2322465.76	231.21
6701169.33	2322473.48	235.79
6701163.6	2322472.63	235.53
6701163.72	2322462.82	232.64
6701156.19	2322466.12	230.14
6701153.62	2322470.17	229.96
6701153.31	2322480.39	232.06
6701159.33	2322483.39	235.91
6701165.21	2322476.2	233.36
6701145.08	2322490.6	237.11
6701138.69	2322502.18	243.95
6701144.07	2322508.93	244.57
6701134.55	2322520.12	243.12
6701128.07	2322499.67	237.55
6701131.93	2322518.68	242.42
6701124.33	2322523.94	241.91
6701136.71	2322525.72	244.16
6701135.68	2322541.85	247.54
6701157.74	2322546.28	250.72
6701141.13	2322551.88	255.28
6701155.2	2322557.01	257.61
6701175.44	2322563.78	261.72
6701160.1	2322591.79	267.75
6701144.2	2322580.75	265.24
6701141.03	2322558.71	257.33
6701132.01	2322562.95	254.31
6701124.26	2322587.69	259.65
6701118.68	2322551.54	245.36
6701098.12	2322549.47	240.21
6701109.13	2322539.89	243.23
6701105.85	2322533.41	240.38
6701100.57	2322536.86	234.63
6701092.62	2322538.14	237.87
6701098.02	2322528.27	232.48
6701104.5	2322524.49	236.47
6701093.53	2322517.78	230.23
6701108.44	2322517.29	236.84
6701108.84	2322511.2	232.02
6701099.45	2322494.86	228.19
6701083.7	2322512.01	227.84
6701082.13	2322510.4	226.42
6701096.84	2322489.67	226.4
6701112.64	2322480	230.75
6701111.03	2322478.52	227.92
6701119.6	2322465.01	226.41
6701057.98	2322453.16	226.86
6701099.96	2322426.23	227.01
6700878.62	2322227.4	227.04
6700929.06	2322180.21	226.92
6700917.18	2322174.78	227.16
6700881.63	2322170.83	226.24
6700867.24	2322182.52	226.68
6700857.79	2322195.86	226.31
6700852.94	2322177.09	230.68
6700844.52	2322186.12	233.98
6700843.9	2322200.2	232.49
6700840.09	2322213.02	228.62
6700830.9	2322209.15	231.93
6700835.6	2322217.6	226.24
6700819.15	2322226.54	229.99
6700816.97	2322211.7	231.58
6700807.12	2322223.51	229.96
6700807.75	2322210.79	234.95
6700802.98	2322216.47	231.3
6700786.74	2322227.76	231.99
6700792.15	2322205.53	236.73
6700783.24	2322219.2	234.94
6700780.5	2322223.57	232.58
6700787.55	2322234.24	233.35
6700775.7	2322223.23	234.03
6700774.97	2322236.52	233.41
6700788.11	2322240.68	228.12
6700797.84	2322239.5	226.66
6700782.36	2322244.21	227.52
6700783.46	2322242.4	231.25
6700776.92	2322245.18	230.41
6700768.62	2322234.51	232.76
6700757.45	2322236.66	235.9
6700767	2322252.68	228.76
6700775.5	2322246.71	227.52
6700754.85	2322243.42	232.19
6700756.19	2322247.36	233.01
6700747.63	2322254.4	231.34
6700741.08	2322258	230.57
6700741.87	2322255.35	236.3
6700743.83	2322246.25	233.56
6700743.3	2322238.72	235.08
6700736.63	2322246.3	235.86
6700737.55	2322238.12	239.53
6700733.51	2322232.55	243.77
6700727.12	2322237.86	244.26
6700729.39	2322249.68	235.72
6700720.87	2322228.27	249.76
6700734.37	2322228.97	246.59
6700712.95	2322207.17	265.21
6700722.49	2322252.99	236.96
6700728.93	2322253.06	237.37
6700725.27	2322259.29	235.29
6700734.06	2322253.2	232.53
6700737.97	2322249.61	233.92
6700707.3	2322261.83	234.25
6700709.52	2322258.23	236.67
6700698.63	2322266.3	238.75
6700699.04	2322256.12	247.14
6700691.24	2322277.23	233.39
6700686.38	2322276.7	236.36
6700678.85	2322273.2	239.18
6700683.87	2322277.4	240.16
6700675.77	2322281.94	234.01
6700673.03	2322301.1	229.6
6700677.18	2322302.19	232.1
6700689.75	2322294.47	229.37
6700671.17	2322308.35	231.26
6700666.03	2322307.87	229.67
6700657.91	2322300.46	231.37
6700657.97	2322298.59	231.3
6700652.45	2322310.47	229.71
6700651.72	2322307.59	229.98
6700645.71	2322308.28	231.77
6700640.45	2322317.07	230.86
6700641.36	2322311.9	229.97
6700635.17	2322310.06	230.04
6700631.97	2322314.79	229.62
6700635.56	2322320.76	226.69
6700619.28	2322321.78	229.73
6700617.8	2322320.47	228.16
6700628.04	2322313.41	230.64
6700625.52	2322314.37	229.72
6700623.49	2322296.5	235.32
6700616.98	2322288.51	242.1
6700621.92	2322294.3	242.72
6700624.48	2322293.55	238.11
6700630.13	2322287.45	238.84
6700643.81	2322282.56	240.56
6700648.19	2322276.96	241.19
6700627.45	2322273.85	246.79
6700638.93	2322267.67	247.78
6700632.25	2322262.61	251.96
6700640.53	2322257.71	253.56
6700639.74	2322250.18	260.91
6700624.24	2322256.54	259.92
6700611.11	2322264.5	260.68
6700612.44	2322281.87	246.59
6700613.25	2322283.09	245.73
6700613.07	2322288.85	246.34
6700649.2	2322247.7	260.52
6700643.86	2322259.74	251.26
6700653.8	2322256.64	252.34
6700653.17	2322259.46	250.22
6700655.84	2322262.12	248.24
6700656.48	2322276.27	242.4
6700654.12	2322282.2	239.63
6700650.19	2322281.87	239.84
6700651.5	2322282.22	235.94
6700645.99	2322292.47	233.41
6700658.1	2322283.44	235.26
6700661.49	2322290.73	234.91
6700664.57	2322283.06	237.15
6700661.88	2322269.25	244.7
6700675.15	2322273.33	241.71
6700637.74	2322303.51	231.7
6700640.27	2322307.01	236.23
6700660.06	2322311.98	231.24
6700741.89	2322231.93	242.75
6700770.13	2322217.36	242.88
6700771.35	2322209.78	246.1
6700764.57	2322210.03	247.48
6700765.62	2322201.59	254.36
6700796.74	2322201.1	242.37
6700776.64	2322214.67	238.26
6700772.65	2322213.42	243.73
6700779.53	2322220.09	242.63
6700803.03	2322199.35	240.42
6700803.22	2322195.9	243.62
6700800.04	2322193.08	242.9
6700805.33	2322195.64	239.08
6700816.28	2322185.15	239.3
6700806.36	2322185.17	245.2
6700804.73	2322177.59	247.62
6700810.66	2322174.39	247.12
6700800.13	2322173.28	255.09
6700797.61	2322153.24	265.07
6700827.11	2322160.98	250.35
6700798.23	2322150.57	265.72
6700774.52	2322138.1	261.36
6700797.8	2322114.33	261.3
6700772	2322119.48	262.01
6700785.53	2322110.29	262.15
6700763.44	2322106.33	269.41
6700775	2322104.84	268.44
6700750.38	2322093.2	268.08
6700753.04	2322117.54	268.65
6700746.28	2322096.69	268.75
6700730.61	2322112.05	267.82
6700733.26	2322132.67	268.53
6700727.26	2322115	270.18
6700723.43	2322115.66	267.97
6700719.82	2322113.42	270.31
6700729.11	2322108.55	268.45
6700727.57	2322099.58	276.09
6700714.37	2322107.33	283.79
6700726.13	2322141.48	269.53
6700752.64	2322131.06	262.98
6700769.89	2322122.46	261.96
6700761.07	2322141.45	261.32
6700752.89	2322148.5	261.27
6700747.73	2322088.82	275.57
6700737.34	2322070.89	299.62
6700753.4	2322079.72	280.56
6700754.61	2322083.09	272.33
6700762.52	2322085.55	267.63
6700760.58	2322081.7	270.95
6700764.9	2322077.29	272.07
6700773.28	2322076.72	268.01
6700795.53	2322083.83	269.18
6700793.35	2322071.9	268.8
6700780.58	2322069.4	268.59
6700773.66	2322070.02	272.46
6700774.24	2322068.54	276.84
6700777.64	2322064.71	277.66
[truncated: 55,363 more rows]
