# Supplementary material for: Seismic signature of turbulence during the 2017 Oroville Dam spillway erosion crisis
Source: Copernicus journal article supplement (doi:10.5194/esurf-2017-71), 2018-01-02
Supplement: Supplementary file 1 [file esurf-2017-71-supplement.zip › 20170323_Oroville_LiDAR.TXT]

6704006.95	2326060.79	965.75
6704014.16	2326233.31	968.09
6704001.62	2326233.5	968.88
6704021.98	2326176.23	966.46
6704020.43	2326072.42	966.12
6704004.06	2326203.07	967.68
6704038.85	2326053.1	952.14
6704011.17	2326247.21	970.29
6704037.74	2326047.95	947.96
6704030.8	2326059.86	961.82
6704034.19	2326173.71	965.15
6704033.55	2326173.16	965.15
6704010.98	2326153.9	966.42
6704004.75	2326139.41	968.27
6704010.16	2326017.82	939.05
6704031.87	2326058.99	957.91
6704014.56	2326015.45	936.39
6704004.57	2326197.98	967.67
6704010.16	2326186.47	967.29
6704024.43	2326054.03	956.25
6704028.37	2326057.51	957.42
6704029.24	2326008.71	928.47
6704020.04	2326008.54	931.5
6704004.15	2326235.65	968.81
6704012.66	2326123.83	965.84
6704029.3	2326002.9	923.69
6704026.57	2326180.21	967.2
6704012.53	2326239.25	970.2
6704010.58	2326241.19	970.18
6704027.82	2326061.45	962.09
6704206.6	2326130.4	940.14
6704082.96	2326073.76	947.55
6704073.26	2326096.71	963.51
6704221.27	2326164.45	946.92
6704281.48	2326189.61	931.13
6704490.42	2326238.37	895.74
6704376.41	2326125.56	905.09
6704289.96	2326145.67	923.77
6704466.13	2326155.89	905.65
6704065.42	2326066.2	947.57
6704508.65	2326148.41	901.55
6704352.31	2326173.11	918.86
6704337.59	2326248.74	914.47
6704215.34	2326072.09	907.03
6704052.45	2326048.66	942.63
6704165.55	2326130.49	956.53
6704195	2326061.55	905.38
6704211.63	2326123.37	935.82
6704193.95	2326194.58	948.96
6704509.13	2326224.56	890.22
6704257.76	2326146.13	932.73
6704156.2	2326078.21	926.19
6704398.03	2326193.55	905.45
6704448.29	2326073.6	906.75
6704412.37	2326197.73	905.61
6704089.28	2326104.72	962.26
6704201.04	2326158.67	950.91
6704151.44	2326079.99	928.51
6704149.18	2326119.69	953.72
6704167.7	2326192.81	954.01
6704198.97	2326070.73	908.99
6704326.98	2326175.56	924.27
6704245.14	2326115.47	917.9
6704246.68	2326110.69	914.17
6704184.46	2326123.21	943.85
6704392.18	2326231.21	905.68
6704341.05	2326206.81	917.54
6704228.57	2326106.43	917.64
6704191.01	2326120.79	939.88
6704088.73	2326092.64	956.46
6704195.88	2326205.61	948.94
6704167.64	2326130.06	955.81
6704352.35	2326233.02	910.79
6704507.85	2326223.56	892.14
6704159.54	2326243.97	953.1
6704071.64	2326089.47	962.68
6704389.65	2326229.01	905.79
6704254.14	2326152.8	938.7
6704149.33	2326229.49	955.2
6704285.67	2326238.92	927.83
6704406.28	2326211.73	905.58
6704499.53	2326235.25	892.92
6704192.11	2326094.11	923.75
6704193.71	2326060.41	905.19
6704393.66	2326192.07	907.15
6704217.71	2326099.06	916.15
6704374.13	2326027.81	903.48
6704225.68	2326071.93	905.35
6704173.05	2326113.14	941.43
6704217.6	2326085.3	913.23
6704074.78	2326137.44	963.37
6704392.19	2326210.11	907.53
6704239.59	2326078.97	905.27
6704214.74	2326123.62	932.89
6704204.25	2326093.2	918.61
6704190.89	2326195.68	949.33
6704220.08	2326233.92	942.01
6704140.8	2326171.78	957.94
6704180.7	2326135.67	952.28
6704041.92	2326003.25	919.7
6704090.53	2326026.44	917.02
6704498.79	2326207.82	898.7
6704347.71	2326235	913.68
6704117.31	2326004.84	904.65
6704217.76	2326087.5	914.61
6704257.46	2326149.67	935.14
6704086.81	2326078.84	949.41
6704217.81	2326122.81	930.46
6704133.61	2326028.8	907.38
6704489.78	2326023.98	906.99
6704129.74	2326033.05	909.33
6704210.02	2326092.29	915.11
6704417.85	2326194.83	905.13
6704121.12	2326102.93	952.37
6704229.87	2326092.57	914.22
6704156.51	2326128.53	957.63
6704154.13	2326131.89	957.73
6704261.29	2326146.99	931.65
6704489.14	2326237.31	896.82
6704232.11	2326121.21	924.79
6704154.2	2326237.38	954.36
6704246.29	2326082.69	905.23
6704295.96	2326216.65	927.94
6704445.68	2326175.44	905.75
6704354.79	2326199.29	916.17
6704344.01	2326231.8	914.06
6704229.08	2326075.05	907.71
6704225.9	2326026.96	903.87
6704486.61	2326254.24	894.19
6704465.51	2326063.46	906.75
6704353.13	2326250.79	910.75
6704508.48	2326224.1	891.91
6704419.27	2326135.97	908.26
6704053.02	2326047.55	941.77
6704074.11	2326226.36	962.82
6704143.97	2326121.05	955.88
6704492.28	2326239.91	894.39
6704362.18	2326176.24	917.54
6704180.21	2326199.99	951.92
6704357.28	2326237.26	909.71
6704219.23	2326250.11	941.98
6704256.19	2326148.54	934.66
6704110.39	2326028.1	911.93
6704506.72	2326191	898.87
6704272.19	2326158.94	936.31
6704183.99	2326126.01	944.82
6704286.81	2326203.3	930.39
6704503.79	2326212.06	896.24
6704184.67	2326056.24	906.85
6704225.05	2326127.16	932.6
6704364.05	2326202.08	914.06
6704491.56	2326236.8	896.19
6704138.38	2326118.12	956.01
6704417.95	2326229.58	902.7
6704097.65	2326076.72	945.44
6704112.66	2326035.98	916.38
6704198.41	2326064.69	908.1
6704133.16	2326227.2	958.28
6704185.57	2326064.72	909.34
6704200.32	2326066.37	908.09
6704410.49	2326201.62	905.54
6704304.27	2326139.23	911.66
6704178.17	2326139.16	955.6
6704197.41	2326212.3	948.41
6704153.53	2326129.43	957.76
6704046.33	2326031.64	936.4
6704417.22	2326194.29	905.23
6704098.11	2326075	944.87
6704142.43	2326038.65	908.57
6704237.2	2326110.18	915.89
6704136.31	2326120.51	958.4
6704163.24	2326057.1	913.43
6704188.45	2326136.32	952
6704382.21	2326220.17	908.34
6704185.06	2326139.54	953.87
6704210.15	2326069.65	906.57
6704160.91	2326120.07	948.83
6704188.84	2326138.68	951.76
6704311.2	2326164.38	926.19
6704217.87	2326196.02	945.22
6704069.21	2326087.38	962.89
6704180.81	2326200.49	951.73
6704141.12	2326049.06	913.77
6704214.96	2326082.86	910.93
6704389.96	2326200.02	908.73
6704235.5	2326078.99	907.6
6704325	2326193.1	922.63
6704280.99	2326135.01	916.2
6704484.73	2326140.96	905.54
6704212.86	2326121.94	932.1
6704502.44	2326240.52	888.85
6704148.32	2326121.4	957.25
6704239.52	2326095.66	912.02
6704231.51	2326075.37	905.37
6704479.34	2326149.04	905.35
6704507.21	2326223.01	892.34
6704380.9	2326083.5	904.22
6704339.19	2326180.89	921.58
6704066.64	2326085.13	962.38
6704247.86	2326166.44	942.16
6704202.12	2326190.49	949.13
6704488.45	2326193.54	901.45
6704383.88	2326243.52	906.61
6704157.14	2326129.08	957.71
6704211.96	2326094	915.5
6704197.13	2326063.59	908.28
6704226.86	2326177.07	944.14
6704246.93	2326205.89	938.22
6704142.5	2326089.6	937.08
6704498.2	2326239.39	892.12
6704234.06	2326122.94	925.43
6704228.41	2326102.56	916.59
6704124.73	2326112.14	956.72
6704283.14	2326133.99	915.21
6704064.63	2326087.48	961.92
6704191.47	2326117.08	937.54
6704214.44	2326084.46	912.44
6704207.11	2326116.86	930.63
6704248.53	2326091.92	905.36
6704234.82	2326149.74	944.04
6704396.99	2326106.35	906.52
6704149.38	2326108.19	946.28
6704400.69	2326220	905.48
6704242.63	2326118.78	919.53
6704508.22	2326215.74	892.92
6704256.83	2326149.12	935.04
6704091.21	2326034.86	922.03
6704217.98	2326128.93	936.17
6704334.47	2326189.9	921.92
6704224.43	2326070.84	905.28
6704098.61	2326009.97	907.71
6704443.97	2326024.03	904.68
6704044	2326033.48	936.74
6704338.16	2326193.06	920.74
6704270.25	2326254.14	930.22
6704357.51	2326160.45	907.9
6704135.06	2326189.23	958.56
6704261.67	2326252.3	932.98
6704149.63	2326114.09	949.35
6704191.27	2326069.75	910.33
6704222.15	2326213.17	942.58
6704074.47	2326060.1	941.32
6704147.6	2326108.4	946.87
6704354.32	2326251.63	907.54
6704117.05	2326020.11	907.6
6704415.66	2326127.55	908
6704247.22	2326094.69	908.81
6704468.46	2326147.64	905.7
6704353.74	2326251.3	910.37
6704208.65	2326155.73	948.91
6704312.17	2326238.42	922.49
6704095.52	2326074.78	943.72
6704283.6	2326208.62	930.34
6704132.08	2326029.55	907.64
6704254.56	2326200.69	936.89
6704296.73	2326225.21	926.23
6704241.77	2326084.45	907.52
6704161.77	2326124.82	953.13
6704276.83	2326027.56	903.74
6704204.49	2326243.23	945.57
6704359.12	2326210.92	913.4
6704505.24	2326239.93	887.67
6704173.32	2326253.56	950.15
6704462.13	2326175.93	903.79
6704227.12	2326222.84	940.86
6704364.49	2326219.01	911.82
6704238.11	2326097.5	913.61
6704308.23	2326252.35	921.75
6704247.26	2326085.81	907.19
6704487.65	2326249.6	895.92
6704288.51	2326149.91	924.53
6704505.74	2326227.08	891.17
6704236.81	2326087.41	907.82
6704485.74	2326247.96	896.5
6704186.36	2326069.34	911.51
6704218.15	2326220.94	943.29
6704097.01	2326022.21	914.16
6704066.62	2326061.04	944.12
6704133.51	2326030.89	909.02
6704350.7	2326254.03	910.29
6704224.87	2326163.92	946.48
6704123.45	2326111.04	956.69
6704238.96	2326078.42	905.24
6704501.39	2326241.98	888.86
6704416.09	2326200.95	904.96
6704224.65	2326232.32	941.17
6704210.7	2326096.5	918.42
6704157.85	2326117.39	948.51
6704218.92	2326185.3	946.16
6704203.03	2326142.86	950.76
6704156.24	2326185.04	956.27
6704355.63	2326158.78	907.64
6704187.88	2326118.05	939.44
6704503.97	2326238.89	888.9
6704228.95	2326205.39	941.84
6704224.32	2326226.16	941.26
6704182.97	2326062.4	908.58
6704184.46	2326134.87	951.72
6704191.74	2326237.57	947.65
6704441.81	2326168.91	905.29
6704507.72	2326220.39	892.37
6704094.18	2326012.06	908.86
6704500.03	2326208.87	898.15
6704503.54	2326230.54	893.39
6704379.91	2326226.31	907.58
6704354.17	2326249.1	910.48
6704096.61	2326073.56	942.41
6704268.77	2326159.62	937.21
6704168.13	2326126.45	950.81
6704122.19	2326007.62	904.66
6704266.5	2326199.45	935.09
6704171.27	2326138.92	955.87
6704268.11	2326147.18	930.77
6704229.37	2326156.51	946.49
6704218.11	2326140.66	944.19
6704210.67	2326064.48	906.67
6704208.06	2326218.22	945.62
6704369.5	2326171.17	911.41
6704304.13	2326191.91	926.1
6704368.69	2326176.23	915.35
6704382.9	2326186.18	911.16
6704129.18	2326116.06	957.69
6704166.87	2326125.33	950.31
6704503.92	2326236.22	890.28
6704074.34	2326067.82	945.58
6704280.69	2326243.53	927.64
6704222.42	2326078.29	907.54
6704505.06	2326226.67	894.18
6704210.86	2326122.58	933.78
6704339.53	2326178.07	921.56
6704366.11	2326171.66	913.57
6704234.85	2326078.43	907.64
6704186.78	2326233.34	948.66
6704369.38	2326214.34	911.57
6704173.99	2326226.04	950.28
6704284.36	2326212.09	930.12
6704200.15	2326063.96	905.72
6704093.11	2326084.34	950.02
6704489.53	2326248.43	895.85
6704229.39	2326239.4	940.2
6704072.4	2326058.28	940.94
6704287.31	2326143.16	920.61
6704302.01	2326199.03	927.03
6704418.64	2326197.66	905.18
6704492.19	2326237.28	894.88
6704185.98	2326057.39	906.93
6704208.95	2326224.47	945.17
6704229.22	2326091.99	913.95
6704209.25	2326145.11	949.67
6704090.77	2326086.82	955.46
6704189.97	2326057.14	905.2
6704239.78	2326136.28	933.92
6704083.55	2326075.94	948.14
6704425.68	2326118.09	908
6704150.34	2326057.24	916.14
6704178.83	2326135.88	953.03
6704153.59	2326046.28	909.13
6704505.06	2326213.07	894.69
6704359.85	2326228.54	910.72
6704344.44	2326207.2	917.18
6704307.52	2326192.59	925.57
6704340.48	2326237.49	914.87
6704205.7	2326065.74	906.19
6704150.15	2326045.45	909.67
6704246.97	2326096.39	909.33
6704195.66	2326062.15	905.72
6704208.17	2326082.9	911.64
6704190.59	2326057.69	905.22
6704194.48	2326149.47	952.97
6704224.41	2326237.62	941.09
6704207.35	2326123.14	935.16
6704221.64	2326106.12	920.24
6704289.32	2326142.47	919.58
6704202.09	2326065.67	906.11
6704505.57	2326006.67	906.67
6704216.73	2326127.82	935.8
6704314.57	2326184.27	927.04
6704223.87	2326074.25	907.53
6704433.82	2326125.23	907.75
6704152.48	2326122.6	954.68
6704150.1	2326205.8	955.94
6704254.46	2326255.27	934.2
6704545.64	2326149.77	886.89
6704512	2326218.86	889.87
6704515.51	2326206.01	891.46
6704564.54	2326010.81	904.14
6704516.76	2326199.32	891.29
6704557.47	2326156.94	883.5
6704521.17	2326205.7	888.04
6704550.78	2326156.87	882.7
6704540.08	2326147.73	887.08
6704516.59	2326082.81	904.16
6704513.64	2326209.57	891.1
6704545.73	2326030.55	904.52
6704539.45	2326155.47	885.51
6704516.85	2326122.38	902.17
6704518.69	2326208.63	888.65
6704521.87	2326211.25	885.98
6704544.62	2326154.18	884.53
6704514.87	2326205.46	891.61
6704525.06	2326172.55	892.36
6704516.1	2326224.89	885.73
6704514.96	2326100.86	903.34
6704525.68	2326173.11	892.73
6704516.15	2326219.49	887.78
6704554.44	2326157.26	883.38
6704539.42	2326147.33	889.72
6704513.24	2326219.89	888.75
6704520.55	2326205.2	888.8
6704513.22	2326188.63	895.27
6704517.19	2326197.48	892.36
6704522.41	2326206.76	887.72
6704561.42	2326157.69	884.17
6704634.6	2326041.28	890.46
6704553.91	2326167.84	880.59
6704529.78	2326205.27	884.33
6704518.7	2326200.93	889.9
6704541.9	2326163.4	887.67
6704532.48	2326160.52	891.57
6704515.85	2326203.98	891.68
6704539.34	2326161.23	888.88
6704538.8	2326146.82	890.29
6704531.22	2326159.46	892.26
6704522.59	2326067.9	904.29
6704529.35	2326157.91	893.75
6704512.92	2326222.26	888.06
6704518.05	2326200.4	890.61
6704027.49	2326655.47	986.39
6704031.5	2326656.6	985.94
6704033	2326709.36	985.67
6704010.59	2326730.24	991.89
6704029.93	2326626.63	982.89
6704035.32	2326636.28	982.37
6704035.01	2326656.99	984.22
6704032.26	2326711.36	985.83
6704004.32	2326417.41	981.72
6704031.96	2326661.99	985.06
6704006.53	2326554.7	981.63
6704022.51	2326725.46	987.81
6704001.63	2326705.36	991.78
6704024.64	2326600.85	982.27
6704032.28	2326488.71	975.56
6704004.93	2326467.67	980.03
6704013.1	2326663.03	988.96
6704029.08	2326451.04	976.21
6704026.83	2326424.3	975.39
6704001.52	2326405.28	981.08
6704029.02	2326654.48	986.04
6704029.55	2326711.28	985.96
6704026.77	2326484.1	977.14
6704025.6	2326633.07	985.01
6704030.16	2326711.79	985.75
6704012.31	2326611.56	985
6704025.3	2326277.57	968.65
6704004.92	2326417.89	981.37
6704015.31	2326645	987.36
6704000.05	2326398.74	979.93
6704014.14	2326268.16	970.65
6704031.57	2326545.66	977.04
6704012.85	2326667.59	989.59
6704031.96	2326664.26	984.82
6704017.45	2326533.61	978.26
6704028.77	2326556.48	978.82
6704037.99	2326669.38	983.24
6704030.62	2326469.54	974.72
6704404.38	2326376.48	890.09
6704197.67	2326331.31	942.24
6704219.44	2326400.82	932.92
6704358.28	2326439.56	896.76
6704316.37	2326474.04	904.44
6704320.56	2326256.93	918.7
6704315.82	2326479.06	904.39
6704457.49	2326309.78	896.59
6704144.69	2326362.32	952.35
6704137.95	2326684.41	961.01
6704205.89	2326457.42	934.53
6704177.8	2326510.12	942.17
6704042.94	2326434.83	972.46
6704215.82	2326308.33	939.3
6704370.83	2326442.05	892.22
6704255.93	2326600.63	924.32
6704339.29	2326349.05	906.17
6704337.9	2326364.56	905.01
6704138.76	2326674.85	960.77
6704203.34	2326566.87	938.04
6704254.54	2326498.11	920.98
6704332.45	2326439.22	900.94
6704077.2	2326576.89	971.68
6704326.78	2326434.48	903.17
6704160.43	2326507.98	946.79
6704117.79	2326553.04	962.53
6704323.41	2326442.82	905.11
6704330.06	2326344.01	908.8
6704076.09	2326731.47	975.12
6704115.77	2326434.65	957.52
6704237.37	2326499.65	925.96
6704255.05	2326352.42	926.79
6704382.35	2326421.45	890.29
6704105.01	2326304.78	960.4
6704420.29	2326367.49	886.78
6704275.52	2326512.89	916.28
6704399.13	2326385.99	892.1
6704286.78	2326505.63	913.03
6704085.7	2326503.69	965.18
6704289.01	2326485.96	912.52
6704063.61	2326588.67	975.98
6704226.08	2326526.89	930.09
6704393.65	2326400.45	889.97
6704160.37	2326675.47	955.82
6704226.36	2326417.69	931.07
6704201.01	2326536.85	937.86
6704121.49	2326508.67	957.51
6704324.94	2326260.66	917.45
6704272.07	2326297.91	927.77
6704196.45	2326297.28	944.16
6704387.71	2326393.16	896.76
6704265.63	2326437.03	920.98
6704203.36	2326408.99	937.86
6704321.34	2326475.59	901.05
6704324.21	2326470.16	903.49
6704077.49	2326327.26	963.66
6704322.98	2326469.11	903.35
6704279.4	2326558.68	917.93
6704288.33	2326555.53	912.54
6704103.75	2326531.41	965.51
6704198.43	2326385.81	940.24
6704163.49	2326413.99	947.54
6704175.61	2326621.94	949.28
6704247.63	2326492.3	922.36
6704399.18	2326369.23	895.85
6704175.36	2326672.58	950.43
6704313.65	2326511.77	902.23
6704321.17	2326408.24	907.8
6704387.71	2326401.15	894.93
6704281.64	2326512.46	913.36
6704308.39	2326483.25	905.9
6704178.15	2326486.7	939.7
6704244.94	2326314.12	932.68
6704159.72	2326651.74	954.86
6704322.13	2326286.82	915.21
6704345.37	2326348.89	903.58
6704161.47	2326592.67	951.82
6704168.12	2326725.24	952.52
6704350.21	2326322.03	905.95
6704175.53	2326388.29	945.48
6704308.33	2326339.63	914.29
6704397.87	2326381.95	893.11
6704298.2	2326402.64	913.7
6704285.86	2326491.32	912.75
6704292.19	2326300.64	921.46
6704160.13	2326616.82	954.05
6704240.18	2326394.07	927.88
6704108.63	2326553.17	965.14
6704273.38	2326556.03	917.86
6704188.87	2326404.52	941.79
6704190	2326553.14	942.27
6704279.4	2326553.38	916.34
6704311.72	2326512.96	904.73
6704418.94	2326360.84	889.79
6704162.64	2326442.67	946.77
6704144.86	2326264.84	954.24
6704258.72	2326328.02	927.5
6704056.73	2326459.45	969.85
6704063.88	2326445.46	967.88
6704308.03	2326520.79	907.46
6704348.42	2326323.56	906.3
6704345.65	2326343.41	904.82
6704362.99	2326281.59	905.26
6704416.56	2326333.45	898.62
6704317.37	2326477.56	902.15
6704138.66	2326692.79	961.82
6704068.82	2326292.7	966.4
6704310.43	2326429.04	909.35
6704092.59	2326451.16	962.03
6704045.76	2326425.09	972.59
6704282.07	2326367.38	919.17
6704325.3	2326444.32	902.9
6704401.49	2326396.44	889.08
6704414.66	2326373.71	885.65
6704304.46	2326349.89	914
6704275.66	2326568.36	918.12
6704171.78	2326654.36	952.65
6704165.83	2326280.32	950.09
6704050.39	2326480.89	970.36
6704103.4	2326652.41	969.18
6704293.13	2326351.36	917.61
6704195.49	2326268.74	945.51
6704238.11	2326416.47	928.19
6704291.8	2326377.77	916.27
6704117.87	2326695.99	965.34
6704146.05	2326330.89	952.43
6704218.13	2326364.72	935
6704395.34	2326399.33	889.35
6704402.1	2326377.23	892.35
6704320.71	2326512.26	899.77
6704288.77	2326537.35	911.96
6704125.75	2326674.11	964.15
6704489.77	2326256.88	892.3
6704181.46	2326713.73	949.54
6704338.33	2326257.92	914.45
6704285.63	2326364.73	918.95
6704434.17	2326342.98	896.72
6704291.75	2326261.01	924.13
6704246.51	2326436.71	925.59
6704278.05	2326528.42	915.68
6704108.48	2326537.84	965.14
6704295.06	2326553.42	912.17
6704105.45	2326525.32	963.92
6704285.81	2326529.55	912.66
6704336.42	2326371.27	904.62
6704292.88	2326530.27	912.17
6704473.42	2326277.75	896.21
6704181.16	2326455.58	941.01
6704164.96	2326333.84	948.41
6704214.99	2326312.92	938.61
6704070.52	2326589.11	974.4
6704293.71	2326360.64	916.76
6704187.16	2326566.04	943.78
6704158.84	2326575.2	951.84
6704361.78	2326448.1	894.71
6704323.36	2326464.05	904.16
6704298.32	2326466.89	911.43
6704267.51	2326279.79	930.3
6704273.47	2326329.42	924.4
6704136.47	2326299.28	955.29
6704401.22	2326351.69	898.46
6704093.26	2326690.75	972.28
6704466.05	2326297.81	894.94
6704238.73	2326449.4	927.23
6704166.01	2326583.67	949.67
6704294.41	2326542.15	912.04
6704300.13	2326318.66	917.94
6704246.95	2326290.13	934.66
6704359.68	2326284.45	906.01
6704173.38	2326394.82	945.83
6704361.9	2326295.14	905.12
6704250.02	2326292.73	933.64
6704075.15	2326530.02	970.14
6704476.03	2326285.32	895.29
6704416.85	2326369.9	887.97
6704399.77	2326391.85	889.38
6704308.79	2326496.81	902.39
6704263.78	2326413.99	922.31
6704049.16	2326361.21	969.56
6704350.29	2326325.1	905.1
6704326.14	2326471.68	900.93
6704322.17	2326465.67	904.37
6704279.56	2326505.23	913.62
6704136.36	2326663.02	962.78
6704402.84	2326349.89	898.47
6704152.54	2326720.11	957.42
6704419.21	2326369.3	886.59
6704354.73	2326308.61	906.01
6704326.22	2326346.38	909.32
6704394.76	2326376.85	894.68
6704273.83	2326441.3	918.19
6704278.91	2326477.48	914.64
6704307.35	2326322.11	916.12
6704060.33	2326323.8	967.79
6704191.68	2326655.79	945.25
6704344.79	2326283.43	910.6
6704338.61	2326266.55	912.98
6704081.38	2326520.11	967.36
6704356.66	2326307.89	905.15
6704394.71	2326398.8	889.62
6704284.74	2326327.63	921.41
6704349.71	2326281.68	909.19
6704364.73	2326288.74	904.4
6704182.32	2326652.81	948.06
6704381.91	2326393.86	897.95
6704107.99	2326651.53	968
6704131.23	2326638.15	961.31
6704365.33	2326289.27	904.46
6704380.64	2326392.77	898.12
6704167.82	2326717.38	952.37
6704207.27	2326398.47	936.83
6704259.14	2326523.38	921.47
6704249.61	2326380.62	926.13
6704146.35	2326632.81	957.31
6704146.63	2326380.13	952.15
6704283.1	2326519.15	913.1
6704220.51	2326501.4	930.62
6704172.45	2326728.95	952.46
6704384.81	2326417.97	891.76
6704066	2326337.83	966.62
6704269.3	2326372.74	921.64
6704323.79	2326391.23	907
6704294.31	2326533.87	911.86
6704263.63	2326456.63	920.37
6704096.87	2326696.74	970.67
6704092.66	2326542.01	968.66
6704396	2326396.97	890.03
6704122.83	2326539.89	960.05
6704268.18	2326412.39	921.39
6704295.7	2326553.95	911.91
6704169.37	2326530.78	947.3
6704135.47	2326295.01	956.34
6704281.82	2326490.78	912.87
6704175.55	2326402.18	945.15
6704264.45	2326385.08	922.69
6704386.44	2326392.08	897.16
6704112.77	2326513.66	960.19
6704129.3	2326349.32	954.97
6704334.35	2326456.94	899.51
6704055.19	2326448.07	970.38
6704354.17	2326305.79	906.02
6704218.24	2326541.16	933.57
6704150.89	2326608.98	954.74
6704294.95	2326361.69	916.5
6704388.89	2326391.21	896.38
6704199.61	2326427.4	937.83
6704359.67	2326429.89	897.81
6704271.27	2326495.37	914.79
6704187.45	2326408.94	942.03
6704215.13	2326266.65	941.92
6704323.59	2326469.64	903.62
6704362.44	2326448.59	893.35
6704260.07	2326350.99	925.56
6704332.82	2326304.59	912.31
6704477.67	2326278.42	893.79
6704294.13	2326549.78	912.3
6704467.89	2326296.49	894.5
6704406.47	2326383.67	887.3
6704183.54	2326389.47	943.66
6704386.96	2326398.1	895.71
6704213.55	2326273.02	942.12
6704186.73	2326332.73	944.24
6704302.56	2326337.06	915.48
6704122.53	2326600.21	962.4
6704278.48	2326493.1	913.15
6704417.73	2326348.58	896.23
6704316.6	2326310.34	914.36
6704326.9	2326393.89	906.8
6704208.85	2326484.01	932.53
6704357.22	2326310.65	903.89
6704301.37	2326547.93	909.19
6704198.9	2326332.35	941.98
6704196.52	2326403.28	939.88
6704306.37	2326449.81	910
6704244.16	2326332.24	930.36
6704140.86	2326628.16	958.45
6704305.37	2326507.68	907.13
6704313.6	2326484.9	901.87
6704207.97	2326277.25	942.72
6704243.06	2326627.99	929.58
6704325.67	2326431.35	905.15
6704102.56	2326685.87	969.15
6704484.19	2326273.48	892.87
6704244.33	2326454.07	925.54
6704164.86	2326544.98	948.52
6704329.05	2326261.98	915.93
6704257.74	2326478.64	921
6704205.67	2326310.75	941.42
6704141.7	2326616.4	958.93
6704200.81	2326529.35	937.46
6704276.3	2326556.02	917.18
6704298.96	2326551.25	911.48
6704342.97	2326267.8	911.94
6704237.9	2326365.2	930.3
6704348.38	2326325.83	906.07
6704121.05	2326543.56	961.13
6704293.99	2326536.48	912.04
6704300.35	2326450.12	910.77
6704351.08	2326317.13	906.11
6704044.42	2326444.1	972.9
6704043.85	2326358.69	970.96
6704310.95	2326485.34	904.01
6704099.24	2326557.59	967.45
6704105.45	2326704.06	969.57
6704239.4	2326414.97	927.93
6704325.57	2326267.1	916.59
6704285.97	2326278.59	924.99
6704148.31	2326276.46	954.01
6704092.93	2326506.97	963.97
6704044.53	2326719.19	982.81
6704290.35	2326481.65	912.4
6704164.66	2326264.89	950.37
6704367.02	2326413.99	898.42
6704201.65	2326305	941.59
6704250.04	2326616.17	928.14
6704208.09	2326312.8	940.85
6704166.49	2326286.21	949.79
6704174.61	2326309.57	947.85
6704175.62	2326731.54	949.9
6704193.45	2326327.77	943.59
6704071.78	2326428.52	964.51
6704382.69	2326405.03	894.18
6704270.32	2326486.37	917.09
6704286.56	2326497.33	912.72
6704333.41	2326459.08	899.64
6704268.05	2326414.99	921.44
6704193.12	2326494.03	936.35
6704254.6	2326594.26	924.54
6704328.62	2326457.72	902.87
6704402.2	2326366.36	893.71
6704150.36	2326377.78	951.01
6704171.25	2326532.37	947.13
6704401.85	2326368.93	893.2
6704222.58	2326572.83	933.1
6704078.43	2326509.93	967.55
6704126.45	2326721.77	963.13
6704189.34	2326580.35	942.45
6704349.64	2326326.87	905.15
6704473.52	2326283.17	895.99
6704154.85	2326642.47	957.02
6704203.21	2326492.13	934.37
6704349.61	2326338.3	903.82
6704294.05	2326544.76	912.08
6704306.48	2326420.4	910.83
6704322.52	2326471.33	901.88
6704266.3	2326337.58	925.24
6704055.81	2326611.89	977.1
6704267.46	2326427.7	920.91
6704141.27	2326305.4	954
6704145.42	2326650.22	959.83
6704131.91	2326324.5	955.23
6704356.6	2326310.17	904.82
6704288.19	2326509.68	912.79
6704377.64	2326428.49	891.48
6704470.23	2326293.46	895.63
6704119.28	2326694.63	965.02
6704075.75	2326470.22	964.22
6704296.53	2326304.3	919.9
6704288.32	2326542.26	912.43
6704394.7	2326395.99	892.35
6704392.47	2326391.22	893.29
6704344.12	2326347.89	904.82
6704333.53	2326290.6	912.24
6704327.55	2326344.61	908.96
6704057.74	2326440.37	970.12
6704158.34	2326384.49	949.16
6704466.07	2326284.78	897.48
6704041.65	2326396.41	971.53
6704359.37	2326298.63	905.38
6704117.17	2326552.52	962.66
6704340.47	2326265.67	912.62
6704350.95	2326282.71	908.3
6704269.13	2326328.85	925.27
6704050.12	2326633.02	979.01
6704287.27	2326503.38	912.77
6704150.48	2326610.93	955.02
6704314.21	2326341.32	911.4
6704330.86	2326305.67	913.07
6704158.05	2326317.45	950.48
6704145.41	2326379.09	952.33
6704477.65	2326276	895.77
6704479.08	2326269.2	895.79
6704070.89	2326275.91	964.16
6704207.77	2326458.99	933.91
6704104.59	2326546.99	966.15
6704117.19	2326299.16	959.16
6704328.1	2326347.99	909.07
6704143.28	2326630.21	957.99
6704478.77	2326274.3	894.24
6704125.78	2326656.21	963.47
6704474.77	2326284.23	895.41
6704306.19	2326392.99	911.92
6704316.75	2326276.34	917.23
6704200.25	2326387.33	939.53
6704290.37	2326324.51	920.22
6704048.57	2326360.74	970.02
6704361.08	2326449.83	893.38
6704241.43	2326588.6	929.45
6704324.83	2326277.52	915.22
6704265.97	2326496.29	917.5
6704157.56	2326609.43	953.22
6704395.99	2326399.87	888.97
6704421.73	2326360.11	889.73
6704100.04	2326632.26	969.39
6704112.97	2326262.91	959.99
6704043.37	2326535.18	974.69
6704186.56	2326435.66	941.31
6704400.41	2326389.75	889.57
6704355.82	2326349.06	901.54
6704350.46	2326459.97	896.25
6704214.51	2326356.13	936.33
6704455.35	2326316.29	896.45
6704120.78	2326515.42	960.49
6704204.97	2326538.05	936.46
6704387.36	2326367.83	898.5
6704306.04	2326489.18	905.19
6704288.92	2326466.95	912.24
6704356.19	2326451.26	894.42
6704130.01	2326685.45	963.9
6704170.32	2326503.86	943.47
6704346.27	2326343.92	904.52
6704324.59	2326459.79	904
6704226.75	2326626.9	935.08
6704141.54	2326283.8	954.67
6704163.57	2326329.57	948.91
6704258.1	2326327.49	927.62
6704269.24	2326386.05	921.05
6704411.05	2326356.7	893.2
6704388.4	2326401.58	892.02
6704301.36	2326263.28	922.1
6704208.34	2326318.66	940.1
6704303.58	2326279.79	920
6704331.22	2326411.05	904.67
6704229.82	2326493.32	927.61
6704188.22	2326317.79	944.93
6704385.49	2326420.94	889.01
6704171.33	2326530.12	946.88
6704287.06	2326262.72	924.93
6704335.03	2326320.16	909.52
6704120.11	2326307	958.37
6704166.21	2326334.89	948.03
6704206.33	2326463.05	934.2
6704214.6	2326307.31	939.85
6704414.17	2326342.95	898.17
6704328.71	2326269.73	915.15
6704362.89	2326446.07	893.45
6704142.39	2326472.57	949.27
6704328.37	2326292.12	913.27
6704203.33	2326447.18	935.81
6704266.24	2326437.54	920.75
6704121.32	2326629.83	964.27
6704192.9	2326292.29	944.86
6704250.94	2326337.99	928.83
6704155.97	2326393.42	949.77
6704305.32	2326478.1	906.74
6704085.87	2326533.97	968.59
6704265.06	2326336.53	925.6
6704203.48	2326538.91	937.09
6704365.86	2326293.16	904.15
6704365.16	2326412.4	898.63
6704158.12	2326564.51	951.65
6704293.51	2326503.09	909.56
6704313.9	2326482.5	902.19
6704308.58	2326334.12	914.36
6704108.31	2326590.34	965.87
6704295.97	2326491.62	907.54
6704213.35	2326306.22	939.7
6704108.35	2326405.5	959.04
6704278.41	2326415.51	918.47
6704296.15	2326507.89	909.13
6704372.76	2326435.39	892.7
6704225.25	2326376.19	932.21
6704415.18	2326340.84	898.31
6704102.09	2326557.71	967.11
6704107.05	2326559.4	966.3
6704066.04	2326544.55	972.8
6704146.95	2326501.93	950.06
6704286.87	2326285.17	924.04
6704325.46	2326454.99	902.41
6704188.9	2326407.82	941.99
6704303.14	2326382.05	912.83
6704207.5	2326516.33	935.02
6704315.08	2326526.54	902.48
6704488.54	2326266.28	891.89
6704096.73	2326598.65	969.4
6704180.78	2326649.22	948.47
6704204.06	2326425.96	936.76
6704313.76	2326525.55	904.89
6704246.45	2326463.76	924.57
6704340.62	2326324.88	907.4
6704255.21	2326336.11	928.13
6704198.3	2326364.32	940.72
6704271.2	2326374.36	921.49
6704180.31	2326560.28	945.19
6704117.28	2326507.28	957.35
6704326.21	2326267.65	916.56
6704055.26	2326484.97	968.8
6704168.93	2326731.38	952.81
6704244.31	2326603.75	928.21
6704289.2	2326515.82	912.7
6704118.64	2326516.66	960.76
6704286.85	2326495.04	912.58
6704344.74	2326348.4	904.45
6704289.58	2326387.24	916.73
6704207.41	2326567.66	936.87
6704190.82	2326409.44	941.93
6704359.03	2326429.34	897.74
6704391.68	2326398.98	893.93
6704087.42	2326662.46	973.14
6704260.88	2326305.36	930.19
6704054.44	2326745.13	979.83
6704155.83	2326605.3	954.43
6704269.97	2326340.66	923.98
6704400.49	2326370.24	893.76
6704332.51	2326431.35	901.29
6704302.83	2326452.25	910.84
6704066.22	2326691.09	977.86
6704093.88	2326543.06	968.65
6704210.84	2326304.09	940.29
6704203.12	2326416.44	937.49
6704132.29	2326528.04	956.83
6704155.08	2326320.11	950.72
6704307.11	2326420.92	910.5
6704210.81	2326334.8	938.06
6704478.95	2326276.99	893.34
6704149.77	2326339.57	951.45
6704297.91	2326300	919.88
6704410.8	2326381.76	885.54
6704104.44	2326697.76	970.33
6704317.36	2326276.85	917.01
6704324.63	2326465.04	902.27
6704237.55	2326407.89	928.67
6704213.47	2326567.69	936.31
6704275.28	2326557.63	917.56
6704305.26	2326480.66	907.51
6704266.47	2326276.64	930.97
6704160	2326573.35	951.2
6704146	2326614.76	957.56
6704152.66	2326494.33	947.33
6704299.84	2326326.76	917.33
6704410.09	2326359.03	892.95
6704297.47	2326468.95	911.34
6704283.87	2326462.77	914.92
6704348.98	2326337.77	904.01
6704043.49	2326594.14	978.46
6704201.53	2326348.53	939.68
6704021.85	2326825.63	988.97
6704036.18	2326796.29	985.55
6704003.58	2326843.47	992.89
6704035.5	2326798.59	985.76
6704009.61	2326747.27	991.91
6704025.7	2326924.54	983.82
6704017.12	2326944.34	986.41
6704011.11	2326981.36	984.09
6704008.56	2326757.15	993.94
6704005.43	2326934.45	988.98
6704023.44	2326952.06	984.02
6704001.56	2326968.11	987.78
6704021.33	2326770.39	989.52
6704005.41	2326941.85	988.48
6704031.99	2326774.23	986.62
6704006.36	2326770.89	993.38
6704033.51	2326757.61	986.81
6704008.38	2326780.49	992.64
6704037.74	2326763.54	984.79
6704028.17	2326768.63	988.78
6704019.66	2326761.31	989.61
6704009.93	2326972.01	986.61
6704011.57	2326905.31	988.13
6704021.03	2326764.87	989.41
6704024.89	2326872.22	986.42
6704000.46	2326930.34	991.61
6704018.49	2326947.85	984.65
6704023.37	2326798.77	990.01
6704019.65	2326946.4	984.38
6704017.38	2326801.5	990.53
6704004.52	2326841.94	992.59
6704051.03	2326798.58	981.69
6704049.58	2326799.98	981.97
6704044.07	2326797.89	984.62
6704043.05	2326747.95	984.05
6704089.75	2326807.91	970.69
6704066.05	2326800.88	978.72
6704088.37	2326811.89	971.17
6704140.26	2326753.73	957.51
6704052.25	2326820.91	981.98
6704040.62	2326808.1	985.34
6704075.69	2326778.29	975.02
6704075.32	2326871.08	974.08
6704072.96	2326827.57	975.21
6704123.13	2326776.3	962.1
6704032	2326028.58	938.49
6704098.66	2326017.09	910.08
6704155.96	2326047.11	909.34
6704068.78	2326041.77	933.82
6704088.6	2326043.09	928.92
6704163.72	2326021.3	904.35
6704155.66	2326039.72	907.36
6704046.75	2326028.24	932.93
6704040.38	2326056.74	951.83
6704010.14	2326024.96	944.66
6704168.54	2326057.42	910.39
6704069.88	2326042.93	934.19
6704050.17	2326012.67	922.24
6704148.28	2326039	907.71
6704157.77	2326025.44	904.57
6704012.91	2326027.86	945.45
6704031.31	2326057.12	955.98
6704072.14	2326029.31	924.55
6704052.16	2326033.96	934.35
6704154.7	2326055.98	915.29
6704032.99	2326052.71	952.29
6704125.91	2326032.64	909.97
6704575.75	2326032.84	899.58
6704444.21	2326004.08	903.56
6704534.42	2326025.18	904.28
6704569.6	2326011.97	901.78
6704440.82	2326000.55	903.44
6704568.76	2326004.1	903.7
6704566.68	2326016.38	901.72
6704622.88	2326025.6	892.37
6704324.19	2326027.91	903.49
6704455.9	2326020.85	905.62
6704414.21	2326055.6	903.42
6704223.35	2326149	946.6
6704133.91	2326334.35	953.2
6704251.49	2326293.6	931.78
6704071.56	2326089.47	961.39
6704269.05	2326338.39	923.1
6704298.38	2326382.16	913.28
6704231.94	2326487.35	925.51
6704125.72	2326521.51	958.02
6704012.25	2326374.35	974.25
6704234.27	2326102.76	914.69
6704005.11	2326417.95	979.55
6704178.47	2326207.15	950.13
6704156.62	2326179.57	955.22
6704210.6	2326495.88	931.66
6704292.44	2326456.32	911.05
6704184.16	2326176.34	952.25
6704110.42	2326402.55	957.07
6704230.22	2326412.04	928.67
6704004.29	2326060.92	966.38
6704269.83	2326173.98	934.11
6704207.39	2326091.96	915.73
6704304.6	2326414.26	912.06
6704238.31	2326367.5	928.61
6704166.84	2326122.62	948.46
6704224.8	2326187.09	943.08
6704313.65	2326281.97	916.33
6704304.47	2326431.65	909.33
6704161.89	2326124.08	951.93
6704042.82	2326375.06	969.8
6704143.7	2326371.91	951.47
6704255.49	2326077.05	904.31
6704196.75	2326436.93	936.86
6704237.12	2326412.48	927.54
6704111.08	2326296.71	958.76
6704219.25	2326077.42	907.53
6704230.51	2326371.88	929.97
6704020.09	2326244.14	967.68
6704121.53	2326515.27	958.58
6704202.61	2326312.45	940.3
6704206	2326139.93	946.5
6704171.97	2326150.56	954.61
6704311.12	2326122.26	905.17
6704179.68	2326410	942.74
6704221.63	2326068.66	905.21
6704211.09	2326071.45	908.16
6704296.93	2326448.83	910.28
6704183.72	2326136.55	952.26
6704228.94	2326101.02	914.43
6704250.88	2326299.37	933.05
6704211.65	2326309.53	938.37
6704146.51	2326478.57	946.68
6704293.15	2326244.52	923.77
6704208.4	2326160.21	949.56
6704219.83	2326201.57	942.91
6704095.14	2326388.81	959.32
6704252.35	2326461.71	921.88
6704126.1	2326488.44	951.35
6704075.72	2326372.3	963.69
6704180.08	2326136.55	954.47
6704224.83	2326126.32	930.85
6704047.79	2326517.64	971.1
6704155.94	2326496.34	945.38
6704264.17	2326388.77	921.31
6704141.09	2326389.32	951.52
6704297.33	2326128.38	907.36
6704211.07	2326456.59	932.06
6704311.95	2326250.88	919.47
6704052.77	2326425.67	968.6
6704124.37	2326112.86	958.94
6704188.03	2326057.67	905.32
6704178.45	2326306.23	946.11
6704227.07	2326074.36	907.57
6704198.06	2326214.78	946.88
6704191.51	2326438.11	938.19
6704265.94	2326487.66	916.76
6704091.34	2326483.43	959.48
6704075.74	2326449.88	963.89
6704204.2	2326234.6	944.53
6704051.07	2326449.21	969.99
6704194.81	2326078.6	913.89
6704298.85	2326303.28	918.21
6704162.45	2326391.75	947.22
6704251.5	2326472.34	921.69
6704141.7	2326279.74	953.46
6704205.21	2326483.59	932.36
6704117.15	2326253.8	958.51
6704274.71	2326224.71	930.27
6704275.87	2326338.83	921.58
6704195.46	2326061.81	905.67
6704253.45	2326147.26	934.86
6704290.03	2326373.28	915.85
6704262.08	2326283.15	930.29
6704239.56	2326132.59	930.09
6704214.7	2326065.64	905.33
6704230.05	2326102.2	914.52
6704218.93	2326117.39	927.53
6704198.72	2326378.72	938.66
6704228.39	2326100.43	914.36
6704168.54	2326140.1	955.74
6704205.22	2326403.31	936.1
6704136.03	2326214.02	956.87
6704194.96	2326098.66	923.86
6704045.38	2326386.42	969.37
6704246.31	2326194.28	937.88
6704243.87	2326103.55	911.04
6704135.63	2326309.6	954.25
6704297.53	2326386.05	913.18
6704265.9	2326390.62	920.8
6704186.2	2326411.92	940.98
6704218.46	2326069.59	907.3
6704222.03	2326190.63	943.58
6704266.26	2326430.49	919.81
6704221.05	2326167.19	945.45
6704248.05	2326224.9	935.42
6704242.02	2326444.09	925.45
6704182.23	2326132.32	950.73
6704317.06	2326249.55	919.34
6704095.4	2326082.44	949.49
6704313.69	2326279.75	916.39
6704245.88	2326330.99	928.9
6704182.44	2326441.71	940.54
6704152.35	2326114.02	948.41
6704191.3	2326404.01	940.09
6704213.92	2326298.89	939.07
6704304.57	2326133.71	907.95
6704213.17	2326244.17	942.44
6704106.31	2326287.62	959.4
6704257.78	2326147.41	935.08
6704109.46	2326281.89	959.29
6704171.51	2326188.92	952.53
6704108.82	2326523.23	961.17
6704222.02	2326103.22	917.02
6704194.25	2326434.25	939.05
6704255.99	2326380.07	923.44
6704226.79	2326166.33	944.52
6704067.48	2326505.91	966.53
6704019.55	2326485.48	976.71
6704236.69	2326429.8	926.97
6704109.02	2326355.44	956.91
6704266.39	2326333.37	925.23
6704298.82	2326216.43	925.42
6704137.67	2326250.15	956.24
6704240.56	2326416.12	926.54
6704260.06	2326384.4	922.34
6704199.64	2326417.38	937.29
6704136.1	2326312.59	954.04
6704195.37	2326142.2	952.52
6704166.57	2326128.96	956.03
6704148.48	2326499.2	948.09
6704265.84	2326254.84	930.42
6704315.88	2326418.22	908.21
6704211.18	2326496.49	931.5
6704308.8	2326335.14	912.95
6704091.86	2326458.46	960.66
6704167.09	2326249.22	949.69
6704143	2326184.8	956.68
6704159.68	2326088.43	930.57
6704050.5	2326429.59	969.4
6704049.26	2326499.61	969.2
6704266.78	2326378.63	921.14
6704263.62	2326178.68	935.11
6704171.89	2326277.66	947.92
6704297.76	2326432.61	912.31
6704130.35	2326337.16	953.69
6704024.84	2326179.46	967.44
6704257.76	2326311.08	928.8
6704146.83	2326084.24	933.56
6704127.88	2326511.11	954.94
6704130.17	2326229.3	958.75
6704189.94	2326096.19	924.47
6704072.54	2326081.31	955.03
6704253.9	2326229	935.52
6704246.94	2326089.01	905.79
6704165.49	2326127.8	955.93
6704280.53	2326363.17	919.71
6704161.75	2326254.09	950.6
6704113.03	2326307.91	958.04
6704277.96	2326440.93	916.06
6704187.36	2326133.81	948.91
6704210.62	2326128.95	937.91
6704137.81	2326305.28	956.69
6704107.66	2326508.88	959.16
6704257.53	2326358.23	924.34
6704220.31	2326078.54	907.79
6704292.36	2326349.78	917.24
6704199.68	2326164.37	948.94
6704274.65	2326322.49	923.44
6704232.81	2326108.01	915.62
6704307.09	2326331.35	914.13
6704266.94	2326418.71	920.31
6704262.25	2326348.44	923.81
6704144.96	2326128.43	957.22
6704072.14	2326090.09	960.95
6704309.78	2326419.8	908.48
6704122.27	2326524.25	957.69
6704240.19	2326081.82	907.42
6704273.76	2326205.75	931.21
6704282.9	2326144.82	922.71
6704205.13	2326416.35	935.8
6704169.42	2326132.04	953.9
6704192.29	2326062.14	908.04
6704256.6	2326418.23	922.76
6704152.54	2326087.56	933.66
6704158.88	2326283.06	950.18
6704242.79	2326359.6	928.18
6704281.24	2326247.36	925.83
6704291.31	2326153.63	928.54
6704100.43	2326075.09	942.22
6704224.54	2326058.24	904.39
6704065.83	2326464.81	965.82
6704112.77	2326325.44	957.14
6704074.84	2326174.69	962.35
6704173.6	2326469.4	940.7
6704214.55	2326085.69	914.38
6704245.67	2326381.74	925.96
6704317.32	2326169.6	926.28
6704024.09	2326059.11	960.66
6704125.2	2326381.36	954.43
6704317.08	2326235.98	921.63
6704025.61	2326186.73	966.1
6704167.33	2326488.12	941
6704272.01	2326300.41	926.32
6704228.22	2326073.06	905.23
6704233.43	2326374.99	928.99
6704255.66	2326284.92	931.59
6704238.31	2326097.6	912.05
6704048.79	2326400.1	968.93
6704202.7	2326323.38	939.33
6704291.74	2326386.21	914.83
6704243.51	2326082.39	905.59
6704204.23	2326204.14	946.06
6704187.44	2326140.45	953.65
6704279	2326268.92	927.05
6704144.01	2326228.83	956.37
6704063.48	2326084.85	960.89
6704075.46	2326335.85	963.14
6704009.08	2326418.06	978.3
6704295.95	2326213.34	926.38
6704086.18	2326069.89	943.13
6704044.95	2326442.76	971.5
6704270.48	2326331.23	923.61
6704292.16	2326140.77	918.44
6704098.8	2326073.38	941.66
6704300.02	2326323.78	916.55
6704224.54	2326425.62	930.79
6704191.54	2326336.86	941.36
6704207.68	2326330.77	937.54
6704311.57	2326270.86	917.83
6704207	2326405.19	935.46
6704109.47	2326410.08	957.22
6704306.3	2326343.76	912.67
6704226.06	2326214.75	940.46
6704101.12	2326411.93	958.36
6704216.49	2326148.47	948.29
6704287.4	2326336.08	920.53
6704069.48	2326441.04	965
6704209.34	2326317.49	938.49
6704299.97	2326343.22	914.49
6704221.24	2326215.87	941.65
6704292.11	2326136.69	914.06
6704150.1	2326254.51	952.42
6704182.42	2326121.73	943.56
6704189.34	2326135.81	952.16
6704145.1	2326283.33	952.89
6704227.58	2326233.4	939.16
6704210.94	2326158.85	947.48
6704225.89	2326091.04	914.27
6704209.38	2326154.7	947.8
6704229.54	2326358.17	931.24
6704296.65	2326220.92	925.69
6704218.68	2326346.63	934.25
6704047.08	2326419.67	970.17
6704176.04	2326102.06	932.16
6704140.7	2326455.62	951.12
6704139.43	2326252.05	954.59
6704217.05	2326095.48	914.96
6704244.5	2326083.39	907.62
6704058.68	2326481.61	966.9
6704150.82	2326219.09	953.92
6704118.81	2326514.2	960.3
6704289.72	2326326	919.25
6704194.45	2326064.43	908.41
6704193.12	2326238.01	946.23
6704224.92	2326397.76	930.37
6704265.44	2326475.54	917.94
6704189.67	2326415.58	939.83
6704004.04	2326419.05	980.07
6704133.35	2326309.68	954.84
6704266.02	2326319.91	925.42
6704176.39	2326243.7	948.25
6704043.8	2326441.54	971.78
6704290.69	2326283.69	921.65
6704192.37	2326143.05	953.08
6704267.28	2326429.57	919.55
6704034.5	2326449.07	973.61
6704203.17	2326389.86	936.88
6704242.09	2326442.4	925.4
6704088.69	2326085.48	953.21
6704202.94	2326387.45	937.11
6704063.69	2326316.59	965.9
6704221.61	2326274.49	938.91
6704135.11	2326228.39	957.03
6704147.79	2326111.79	949.04
6704241.65	2326134.78	931.01
6704305.78	2326205.71	924.32
6704294.83	2326200.7	927.17
6704015.55	2326266.04	969
6704174.25	2326515.59	943.13
6704130.32	2326274.16	956.44
6704299.78	2326351.5	914.14
6704166.2	2326409.04	945.86
6704007.6	2326455.49	979.99
6704044.59	2326429.47	971.25
6704294.38	2326150.03	922.42
6704305.23	2326202.69	924.69
6704282.29	2326214.86	928.95
6704061.16	2326304.86	966.32
6704043.66	2326413.71	971.01
6704240.6	2326494.7	923.43
6704015.63	2326189.28	968.66
6704228.63	2326495.44	926.98
6704148.79	2326501.49	948.28
6704286.35	2326230.22	926.5
6704188.97	2326058.59	908.12
6704217	2326135.7	939.77
6704154.11	2326239.6	952.96
6704259.93	2326081.76	904.37
6704066.92	2326081.97	957.46
6704002.84	2326417.75	981.6
6704167.77	2326130.28	954.1
6704208.94	2326369.86	936.08
6704282.89	2326337.93	920.09
6704196.31	2326160.75	950.01
6704264.69	2326138.84	924.73
6704258.39	2326331.11	926.17
6704300.91	2326414.93	911.88
6704296.05	2326220.27	926.18
6704179.86	2326058.72	907.86
6704226.04	2326324.78	934.65
6704046.51	2326425.38	970.78
6704195.44	2326336.58	940.51
6704048.95	2326518.85	971.21
6704199.7	2326229.8	945.46
6704065.08	2326060.61	944.54
6704293.06	2326128.29	908.23
6704296.7	2326147.88	920.58
6704245.23	2326370.58	926.59
6704236.57	2326105.22	913.6
6704228.31	2326082.7	907.68
6704204.04	2326356.23	937.87
6704189.17	2326455.68	937.69
6704175.23	2326393.64	944.32
6704258.92	2326320.8	926.94
6704066.58	2326313.01	964.92
6704044.81	2326395.86	971.08
6704083.75	2326481.65	961.19
6704043.5	2326428.31	971.62
6704069.87	2326512.95	967.86
6704291.93	2326218.08	927.34
6704267.21	2326264.86	929.23
6704154.46	2326520.05	949.97
6704307	2326421.45	908.96
6704198.52	2326276.06	943.48
6704019.94	2326060.9	961.29
6704213.31	2326172.13	946.69
6704192.69	2326410	939.67
6704210.41	2326382.35	935.13
6704098.24	2326072.79	941.7
6704302.27	2326220.13	924.24
6704213.46	2326084.53	914.09
6704234.5	2326160.95	943.77
6704058.33	2326476.38	967.32
6704270.16	2326239.85	929.61
6704119.57	2326072.64	935.05
6704152.31	2326256.86	951.98
6704248.9	2326084.05	905.19
6704166.35	2326163.78	955.81
6704174.38	2326150.59	954.32
6704207.58	2326081.36	910.89
6704264.43	2326376.14	921.43
6704000.6	2326454.92	979.46
6704195.9	2326062.22	908
6704010.72	2326456.75	978.23
6704215.46	2326304.9	938.29
6704316.57	2326180.61	925.42
6704267.14	2326314.47	925.8
6704165.18	2326506.06	944.05
6704244.47	2326458.06	924.24
6704063.69	2326447.55	966.91
6704258.66	2326146.14	932.29
6704286.02	2326360.6	917.34
6704261.25	2326308.15	928.45
6704237.38	2326078.83	907.78
6704276.5	2326318.12	922.42
6704199.32	2326353.39	939.16
6704176.8	2326250.65	947.99
6704257.24	2326344.92	925.63
6704210.53	2326308.34	938.74
6704186.09	2326489.03	936.52
6704164.87	2326308.55	947.94
6704163.6	2326101.94	937.04
6704193.42	2326137.66	949.65
6704099.45	2326410.17	958.62
6704190.45	2326137	952.05
6704223.85	2326071.01	905.25
6704310.25	2326418.58	908.43
6704314.15	2326422.71	908.36
6704250.73	2326492.02	920.28
6704194.19	2326134.13	947.02
6704177.51	2326423.32	942.72
6704210.94	2326261.13	941.69
6704129.3	2326298.5	956.18
6704150.64	2326112.18	949.14
6704064.95	2326436.24	966.1
6704100.92	2326079.11	944.55
6704222.4	2326141.41	941.38
6704272.85	2326378.74	919.94
6704281.44	2326163.56	934.07
6704220.2	2326112.14	923.12
6704314.22	2326403.85	907.61
6704222.15	2326123.49	930.23
6704315.89	2326248.3	919.77
6704057.14	2326453.45	968.39
6704141.38	2326273.17	953.79
6704288.12	2326247.98	924.56
6704158.18	2326333.52	948.68
6704193.68	2326238.61	946.2
6704258.28	2326128.08	920.43
6704232.01	2326369.1	929.99
6704252.47	2326468.62	921.6
6704191.53	2326408.77	939.89
6704213.96	2326067.5	906.86
6704199.84	2326339.29	939.32
6704051.58	2326500.12	968.85
6704146.42	2326220.81	954.95
6704192.83	2326444.09	937.52
6704125.74	2326425.14	954.07
6704071.24	2326445.14	964.65
6704029.52	2326058.26	961.57
6704288.64	2326212.33	927.85
6704076.64	2326307.73	963.33
6704217.68	2326203.29	943.3
6704007.93	2326258.04	969.27
6704149.52	2326110.99	949.32
6704137.88	2326469.44	949.29
6704256.55	2326303.12	930.17
6704225.93	2326073.16	907.64
6704072.17	2326068.09	946.46
6704125.79	2326513.2	955.77
6704090.44	2326083.54	950.76
6704165.59	2326108.23	941.59
6704212.44	2326086.44	913.89
6704287.29	2326156.08	929.09
6704173.54	2326507.11	941.92
6704050.4	2326391.71	968.46
6704106.69	2326488.86	955.3
6704226.5	2326073.77	907.57
6704004.54	2326417.34	979.84
6704287.33	2326389.84	915.96
6704073.96	2326344.76	963.56
6704132.76	2326244.98	956.11
6704277.84	2326300.04	924.14
6704236.45	2326077.91	905.21
6704119.87	2326254.43	957.94
6704134.15	2326259.4	955.02
6704058.03	2326310.6	968.27
6704171.45	2326123.66	947.57
6704282.45	2326137.42	918.97
6704222.74	2326208.72	941.79
6704239.87	2326326.48	930.36
6704073.92	2326293.6	963.9
6704247.76	2326229.12	935.34
6704078.48	2326495.68	962.82
6704152.79	2326343.12	949.46
6704138.29	2326348.12	952.19
6704259.49	2326312.92	928.06
6704164.61	2326201.24	952.62
6704178.29	2326437.33	942.01
6704265.91	2326442.93	919.26
6704146.41	2326103.93	945.42
6704054.16	2326349.54	967.37
6704020.2	2326403.77	974.96
6704287.57	2326464.23	912.28
6704180	2326320.22	945.59
6704288.84	2326359.45	916.7
6704069.01	2326466.04	964.95
6704166.26	2326505.5	943.7
6704219.64	2326145.1	944.74
6704313.64	2326172.73	926.41
6704153.39	2326382.16	949.31
6704234.24	2326390.36	928.17
6704179.44	2326116.03	940.39
6704088.53	2326087.98	955.79
6704215.34	2326248.73	941.84
6704022.8	2326517.72	975.31
6704250.39	2326106.06	909.97
6704212.73	2326411.28	933.7
6704119.21	2326439.33	955.38
6704166.1	2326524.05	946.37
6704129.3	2326202.7	957.75
6704188.56	2326058.23	905.42
6704215.98	2326259.83	940.84
6704181.67	2326505.17	939.02
6704142.72	2326487	947.52
6704215.48	2326120.38	929.24
6704202.43	2326066.22	908.15
6704108.73	2326200.54	959.22
6704267.66	2326375.11	920.9
6704259.96	2326436.64	921.19
6704049.13	2326432.15	969.83
6704138.46	2326325.7	952.72
6704247.03	2326378.86	927.06
6704103.18	2326470.42	958.94
6704118.67	2326436.59	955.59
6704044.1	2326372.41	969.56
6704270.53	2326459.16	917.3
6704125.34	2326169.97	958.5
6704156.98	2326238.5	952.33
6704251.31	2326343.12	927.01
6704213.83	2326159.45	947.33
6704032.91	2326058.82	956.06
6704293.37	2326336.11	918.6
6704156.09	2326126.91	955.69
6704005.19	2326444.38	978.7
6704212.23	2326058.7	904.73
6704166.14	2326384.05	946.14
6704046.96	2326442.67	970.69
6704208.4	2326329.43	937.8
6704243.96	2326360.86	927.63
6704116	2326288.78	959.74
6704256.93	2326357.59	924.56
6704218.66	2326210.68	943.88
6704192.18	2326149.47	953.11
6704254.24	2326378.22	924
6704193.28	2326460.03	936.26
6704198.39	2326249.82	944.54
6704208.7	2326156.46	947.77
6704264.04	2326206.28	933.49
6704008.05	2326251.51	970.33
6704177.5	2326492.72	939.09
6704147.86	2326475.72	946.5
6704221.38	2326135.98	939.6
6704164.83	2326129.66	956.69
6704111.36	2326517.35	959.76
6704249.54	2326341.23	927.63
6704030.59	2326181.75	965.58
6704210.65	2326516.7	932.82
6704022.91	2326476.15	976.04
6704157.06	2326095.01	936.95
6704201.58	2326159.52	951.08
6704207.49	2326315.47	940.77
6704293.26	2326233.03	926.17
6704137.86	2326471.17	949.17
6704187.64	2326517.59	938.9
6704241.87	2326083.6	907.5
6704229.57	2326128.59	932.52
6704084.36	2326080.88	953.23
6704286.1	2326243.55	925.34
6704255.44	2326155.96	940.09
6704245.69	2326452.8	923.99
6704198.34	2326382.56	939.17
6704236.74	2326098.51	914.49
6704157.75	2326126.25	954.64
6704104.16	2326441.76	958.33
6704094.23	2326087.52	952
6704123.06	2326518.72	957.88
6704275.11	2326444.57	916.68
6704210.52	2326104.68	922.07
6704017.36	2326470.26	977.25
6704245.78	2326087.76	906.51
6704199.98	2326406.38	937.6
6704288.8	2326371.97	916.4
6704305.21	2326230.12	922.49
6704196.76	2326287.16	944.33
6704290.33	2326391.02	915
6704208.6	2326260.66	942.41
6704265.17	2326312.31	928.32
6704030.08	2326071.52	964.92
6704095.2	2326455.72	960.17
6704110.26	2326490.53	954.67
6704281.82	2326143.68	922.21
6704156.48	2326334.11	949.11
6704312.94	2326410.57	907.98
6704121.18	2326504.08	955
6704142.19	2326119	955.13
6704185.35	2326395.38	941.9
6704168.42	2326127.11	951.29
6704305.87	2326426.73	909.21
6704067.79	2326447.8	966.81
6704293.43	2326355.76	915.58
6704271.25	2326415.14	919.47
6704201.74	2326401.54	937.14
6704236.52	2326236.53	938.63
6704303.89	2326392.8	912.41
6704019.76	2326401.11	974.94
6704145.86	2326288.38	952.52
6704229.06	2326108.2	917.4
6704173.49	2326376.25	944.8
6704177.74	2326254.03	947.87
6704125.52	2326318.88	955.44
6704287.97	2326390.53	915.48
6704113.72	2326420.74	956.45
6704051.32	2326473.79	969.34
6704125.18	2326352.34	954.33
6704097.34	2326496.03	958.63
6704189.18	2326133.19	948.03
6704301.8	2326411.31	911.69
6704289.31	2326228.85	926.13
6704214.1	2326520.34	931.97
6704259.19	2326146.69	932.83
6704134.5	2326240.32	956.2
6704174.78	2326189.94	951.89
6704240.39	2326095.44	910.5
6704294.95	2326228.39	925.14
6704233.15	2326125.81	927.79
6704240.3	2326407.63	926.8
6704291.63	2326334.28	918.14
6704067.8	2326063.45	946.47
6704308.18	2326422.71	908.63
6704005.8	2326392.93	977.05
6704179.8	2326243.55	947.73
6704288.76	2326144.03	923.1
6704223.81	2326216.22	940.96
6704131.69	2326325.42	954.1
6704202.97	2326087.24	916.11
6704249.04	2326095.14	907.96
6704147.47	2326215.54	954.75
6704059.44	2326455.88	967.92
6704029.49	2326064.77	962
6704190.79	2326189.81	949.74
6704054.18	2326518.01	971.6
6704252.63	2326223.29	934.64
6704298.56	2326445.8	910.24
6704270.9	2326383.02	919.61
6704245.74	2326091.62	908.3
6704017.75	2326221.31	967.61
6704260.64	2326353.06	924.07
6704176.26	2326335.31	944.9
6704012.97	2326243.45	968.85
6704315.01	2326167.13	927.05
6704289.6	2326441.01	914
6704231.42	2326076.39	907.65
6704266.28	2326300.9	927.88
6704069.72	2326508.26	966.67
6704142.37	2326236.1	955.06
6704069.35	2326295.87	964.77
6704172.68	2326261.66	948.28
6704277.62	2326332.31	921.6
6704208.39	2326133.2	941.33
6704163.54	2326268.8	949.16
6704240.4	2326403.15	926.64
6704018.72	2326235.62	967.78
6704179.13	2326138.36	955.03
6704155.32	2326350.44	948.66
6704188.91	2326135.42	950.05
6704220.36	2326105.66	920.21
6704175.82	2326394.26	944.2
6704173.84	2326132.82	952.46
6704253.96	2326093.5	905.95
6704183.3	2326120.13	940.76
6704278.96	2326361.54	918.61
6704204.57	2326111.63	928.1
6704149.73	2326344.52	950
6704150.57	2326388.19	949.77
6704174.17	2326312.03	946.42
6704150.43	2326125.07	956.2
6704093.54	2326090.6	954.17
6704189.14	2326336.36	942.39
6704269.57	2326299.74	926.87
6704218.12	2326179.95	945.17
6704228	2326474.51	928.06
6704290.67	2326462.7	911.38
6704261.91	2326491.9	917.37
6704190.99	2326414.93	939.49
6704160.88	2326319.07	948.45
6704200.65	2326385.02	938.22
6704307.28	2326131.87	906.79
6704004.34	2326445.7	978.72
6704282.2	2326280.84	924.71
6704108.48	2326440.18	957.5
6704165.07	2326516.71	945.7
6704127.51	2326466.37	952.69
6704002.61	2326133.09	967.62
6704034.6	2326488.56	973.47
6704214.97	2326058.96	904.56
6704199.71	2326334.89	939.64
6704247.27	2326299.84	933.49
6704162.35	2326091.25	931.32
6704313	2326292.38	915.48
6704072.07	2326100.18	963.49
6704231.17	2326083.11	907.58
6704102.36	2326520.88	962.7
6704181.11	2326205.61	949.89
6704235.26	2326101.05	913.36
6704074.4	2326291.62	963.8
6704312.11	2326191.91	924.3
6704199.97	2326070.3	908.63
6704316.13	2326399.18	907.24
6704248.24	2326231.88	935.26
6704187.52	2326137.92	951.66
6704215.7	2326083.12	912.28
6704220.53	2326252.03	940.42
6704257.28	2326146.89	934.37
6704192.32	2326267.12	946.15
6704201	2326498.39	933.82
6704120.45	2326115.08	959.87
6704289.91	2326269.6	922.57
6704213.49	2326147.82	948.61
6704165.07	2326401.24	946.09
6704237.52	2326103.48	912.84
6704224.27	2326071.39	907.73
6704268.73	2326414.18	920.15
6704273.86	2326171.6	933.41
6704031.84	2326057.69	955.98
6704161.04	2326149.13	955.62
6704021.53	2326062.56	962.02
6704161.24	2326123.34	954.05
6704190.98	2326457.59	936.96
6704132.54	2326355.34	953.41
6704289.95	2326147.69	923.05
6704056.27	2326345.33	967.04
6704236.96	2326078.44	905.65
6704237.42	2326099.27	912.64
6704208.04	2326316.06	940.53
6704175.38	2326255.89	948.36
6704169.64	2326058.59	910.44
6704045.28	2326415.43	970.55
6704148.64	2326181.58	957.18
6704295.31	2326140.05	915.36
6704268.13	2326381.97	920.18
6704157.36	2326121.81	953.72
6704189.99	2326434.24	938.99
6704198.46	2326333.55	940.52
6704012.32	2326262.65	969.08
6704186.42	2326202.36	949.35
6704179.63	2326301.04	945.78
6704120.97	2326514.69	958.53
6704307.19	2326365.58	911.83
6704215.98	2326094.35	914.72
6704093.33	2326125.7	961.31
6704176.68	2326333.39	944.94
6704293.69	2326162.83	931.51
6704211.38	2326511.27	932.33
6704265.69	2326142.55	928.27
6704205.51	2326133.01	943.77
6704149.55	2326384.8	950.13
6704229.29	2326076.72	907.52
6704290.3	2326241.46	924.72
6704166.33	2326519.9	947.05
6704187.57	2326232.13	947.27
6704157.17	2326147.68	955.73
6704147.56	2326147.93	956.66
6704199.17	2326198.75	947.67
6704313.47	2326259.3	918.65
6704240.88	2326089.02	907.49
6704238.61	2326507.83	924.51
6704269.34	2326471.29	917.28
6704047.52	2326443.27	970.53
6704025.07	2326325.14	970.87
6704188.03	2326249.77	947.36
6704218.29	2326307.91	937.52
6704184.35	2326202.58	949.79
6704248.25	2326489.39	921.15
6704268.12	2326413.54	920.37
6704177.45	2326311.31	945.9
6704292.72	2326141.36	918.43
6704299.54	2326310.4	917.34
6704020.59	2326194.55	966.57
6704048.56	2326433.66	969.98
6704255.93	2326270.1	931.96
6704068.81	2326077.35	955.16
6704288.21	2326150.39	925.98
6704244.63	2326090.44	908.18
6704165.84	2326061.18	913.69
6704175.22	2326080.65	921.64
6704275.84	2326428.14	917.54
6704275.08	2326351.01	921.81
6704160.68	2326376.12	947.12
6704028.88	2326497.64	973.93
6704210.44	2326117.79	930.53
6704061.82	2326089.3	963.82
6704136.71	2326184.34	957.19
6704226.9	2326486.94	926.91
6704167.62	2326249.79	949.64
6704262.48	2326111.89	908.64
6704213.05	2326452.08	931.81
6704239.94	2326092.4	909.56
6704190	2326215.06	948.05
6704233.81	2326129.18	930.15
6704132.75	2326210.53	957.54
6704222.7	2326215.03	941.31
6704529.01	2326201.84	883.43
6704433.09	2326102.45	906.36
6704521.8	2326106.36	900.33
6704506.58	2326102.02	903.65
6704346.01	2326275.96	909.46
6704475.04	2326083.06	905.26
6704369.99	2326274.43	902.64
6704418.13	2326198.96	903.74
6704499.88	2326177.37	900.84
6704437.94	2326127.56	906.03
6704511.06	2326196.24	893.71
6704343.82	2326209.89	915.34
6704343.02	2326365.45	901.35
6704438.29	2326179.5	905.06
6704394.41	2326229.38	904.27
6704344.95	2326345.94	902.81
6704340.99	2326324.17	906.15
6704336.07	2326375.6	902.27
6704522.14	2326078.54	902.28
6704508.04	2326228.74	887.37
6704528.79	2326141.83	894.82
6704513.71	2326221.41	886.91
6704506.13	2326233.42	887.99
6704333.09	2326346.34	905.91
6704461.56	2326166.04	903.74
6704377	2326320.65	899.99
6704331.11	2326415.17	902.08
6704325.02	2326120.66	904.37
6704371.24	2326307.77	900.72
6704343.92	2326351.57	902.19
6704528.42	2326173.69	888.42
6704502.63	2326168.77	900.57
6704360.8	2326200.24	913.86
6704364.32	2326231.91	907.92
6704357.08	2326308.07	903.16
6704328.24	2326336.44	907.91
6704359.45	2326308.68	902.32
6704488.13	2326239.52	895.22
6704497.73	2326244.72	887.84
6704493.79	2326247.26	891.23
6704518.76	2326172.07	893.93
6704341.14	2326275.44	910.71
6704553.44	2326167.94	883.03
6704332.04	2326351.61	905.8
6704356	2326252.4	906.83
6704491.4	2326243.04	892.72
6704320.05	2326252.79	917.43
6704542.2	2326141.75	890.62
6704537.5	2326151.19	885.26
6704521.41	2326207.37	885.87
6704406.58	2326214.29	903.77
6704387.51	2326173.09	905.15
6704326.51	2326170.28	924.3
6704339.95	2326411.96	900.06
6704363.75	2326272.22	906.2
6704517.8	2326198.7	889.65
6704538.17	2326156.3	889.01
6704482.23	2326228.05	899.92
6704401.06	2326082.1	903.57
6704493.75	2326238.57	892.32
6704533.94	2326147.32	890.58
6704382.94	2326244.76	905.02
6704387.61	2326265.79	901.45
6704342.15	2326325.4	906.03
6704574.17	2326081.16	894.51
6704318.25	2326182.41	924.83
6704371.29	2326169.73	907.81
6704551.36	2326151.41	887.54
6704544.26	2326162.85	883.27
6704347.09	2326337.46	903.34
6704357.68	2326308.72	902.79
6704409.87	2326203.59	905.39
6704403.46	2326217.88	904.01
6704356.83	2326189.06	917.77
6704329.1	2326376.27	905.98
6704349.71	2326338.4	902.37
6704496.23	2326189.07	900.43
6704335.51	2326409.11	900.85
6704320.83	2326235.21	919.19
6704388.26	2326176.27	905.28
6704483.18	2326263	893.01
6704484.89	2326175.33	901.77
6704332.01	2326292.8	911.15
6704416.2	2326203.61	903.29
6704376.33	2326251.51	906.28
6704420.62	2326075.37	905.06
6704401.16	2326229.24	903.01
6704328.43	2326341.35	907.74
6704539.49	2326151.31	884.78
6704357.32	2326212.38	912.25
6704434.49	2326123.94	906.17
6704327.79	2326347.04	907.85
6704323.34	2326169.48	926.29
6704350.81	2326332.94	902.05
6704343.72	2326320.6	906.06
6704323.03	2326376.27	906.13
6704528.98	2326146.53	893.22
6704338.37	2326253.98	912.98
6704368.97	2326229.8	908.61
6704339.47	2326398.4	900.29
6704555.37	2326155.71	883.22
6704338.93	2326266.32	911.8
6704317.89	2326351.3	909.51
6704425.41	2326141.13	906.72
6704348.57	2326345.51	901.85
6704419.4	2326202.38	903.02
6704382.26	2326244	906.23
6704373.98	2326237.25	906.57
6704321.64	2326171.98	925.09
6704492.49	2326237.21	893.33
6704551.69	2326130.73	890.27
6704488.82	2326255.7	891.81
6704364.25	2326300.29	901.92
6704531.76	2326158.41	890.68
6704488.56	2326246.62	894.07
6704502.14	2326236.12	890.01
6704516.63	2326209.19	888.18
6704326.72	2326360.71	906.7
6704518.68	2326149.65	898.75
6704347.74	2326338.16	902.84
[truncated: 366,182 more rows]
