# Supplementary material for: Seismic signature of turbulence during the 2017 Oroville Dam spillway erosion crisis
Source: Copernicus journal article supplement (doi:10.5194/esurf-2017-71), 2018-01-02
Supplement: Supplementary file 1 [file esurf-2017-71-supplement.zip › Oroville_Spillway_02-24-2017_Project_Metadata.pdf]

# Oroville\_Spillway\_02-24-2017\_Project\_Metadata

## Shapefile

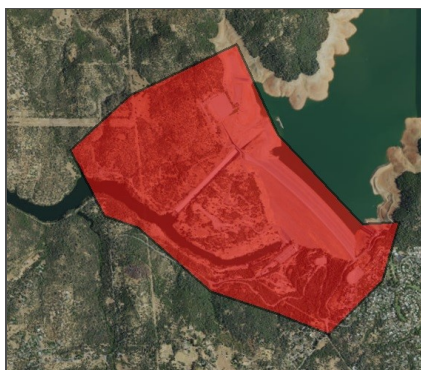

## Tags

Oroville Dam Spillway, Airborne LiDAR Data, Orthophoto Imagery

## Summary

The purpose of this project was to provide aerial survey documentation of site conditions following damage to the Oroville Dam Spillway. The study area was initially limited to the spillway structure however; the Task Order was amended to expand the study area to the extent shown here. This work was performed by Towill, Inc. under DWR Contract 4600011239 Task Order 9.

## Description

**Survey Control** – Ground control survey for this project was provided by DWR. A network of aerial targets were marked and surveyed for use by Towill, Inc. and for use with unmanned aerial systems (UAS) being operated at Oroville Dam by others. Survey control values were supplied by the file "Staked Flight Panels To Date\_170224.csv" which we received on 02/24/2017 via email.

**Airborne Data Acquisition** - The LiDAR survey was accomplished using an Optech Orion M300 LiDAR system operating from a fixed wing aircraft (Twin Engine Cessna 402 Tail # N1008A). The airborne mission was conducted on February 24, 2017.

The mission plan was based on the following:

Aircraft Flight Altitude: 3000' AMSL

Aircraft Speed: 120 knots

Number of Flight lines: 11

Nominal Point Density: 10 PPM<sup>2</sup>

LiDAR Data Post-Acquisition Processing

**Airborne GPS Data Processing** - Using Novatel, Inc.'s Grafnav version 8.20 software, the differential kinematic data was processed from two base stations, and the solutions compared. This procedure is intended to verify the integrity of the base station coordinates and elevations. Each processing session was computed in both the forward and reverse temporal directions. The comparison of these solutions is intended to provide insight into the quality of

the kinematic ambiguity resolution. The horizontal and vertical datums of the LiDAR data set were realized by adjusting the coordinates of the base station points and the relative application of the geoid model to the final data set.

Two base stations were used to process the ABGPS data: ORVB (CORS) and MC1 located at the McClellan Airfield.

IMU Data Processing and Best Estimated Trajectory - The post-processed ABGPS trajectory was combined with the raw, high-frequency IMU observations in a loosely-coupled Kalman filter-based processing algorithm to produce the final high-frequency Smoothed Best Estimated Trajectory (SBET) using Applanix's POSPac software, version 4.3.

Optech's LiDAR Mapping Suite (LMS) -The ABGPS and integrated IMU data files were used as inputs to process the laser range files collected during the mission. The LMS software package assembles each of these three components and outputs fully georeferenced LAS strip files. The overlap between adjacent strip files are analyzed and if elevation differences exist, these values are used as feedback and the process is repeated.

#### LiDAR Data Classification

Terrasolid's Terrascan V.1.2 software was used to tile the LAS strip files into manageable size files and to run macro routines which assist in the ground classification. Shaded relief terrain surfaces were reviewed visually for artefacts which were manually reclassified as non-ground features.

Following a thorough QA/QC review by an analyst, ground points comprising the "bare-earth" surface were used to generate three separate deliverables:

ArcGIS DEM -all ground points are used with ArcGIS 10.2 to develop a 32-bit raster DEM with a 1ft GSD.

InRoads Terrain Surface - "bare-earth" ground is keypointed and MicroStation is used to create an InRoads TIN surface.

Civil 3D Surfaces - "bare-earth" ground is keypointed and AutoCAD is used to create an Civil 3D TIN surface.

#### Aerial Imagery

Aerial imagery was acquired for the study area simultaneously with the LiDAR using a Phase One iXU 1000 (100 megapixel) camera system. This was used to generate orthophoto imagery with a 0.25ft pixel resolution. The imagery was delivered as GeoTIF tiles and MrSID mosaics.

#### Credits

Towill, Inc. extends thanks to the California Department of Water Resources.

#### Use limitations

There are no access and use limitations for this item.

## Extent

**West** -121.513345    **East** -121.472067  
**North** 39.553193    **South** 39.525011

## Scale Range

**Maximum (zoomed in)** 1:5,000  
**Minimum (zoomed out)** 1:150,000,000

## ArcGIS Metadata ►

### Topics and Keywords ►

\* CONTENT TYPE Downloadable Data

*Hide Topics and Keywords ▲*

### Citation ►

\* TITLE Oroville\_Spillway\_02-24-2017\_Project\_Metadata  
 CREATION DATE 2017-02-24 00:00:00  
 PUBLICATION DATE 2017-03-31 00:00:00

PRESENTATION FORMATS \* digital map

*Hide Citation ▲*

### Citation Contacts ►

#### RESPONSIBLE PARTY

INDIVIDUAL'S NAME Dan Mardock, PLS  
 ORGANIZATION'S NAME Department of Water Resources  
 CONTACT'S POSITION Contract Manager  
 CONTACT'S ROLE originator

#### CONTACT INFORMATION ►

PHONE  
 VOICE 916-704-6914

#### ADDRESS

TYPE both  
 DELIVERY POINT 1416 9th Street, Room 150  
 CITY Sacramento  
 ADMINISTRATIVE AREA California  
 POSTAL CODE 95814  
 COUNTRY US  
 E-MAIL ADDRESS daniel.mardock@water.ca.gov

*Hide Contact information ▲*

*Hide Citation Contacts ▲*

## Resource Details ►

DATASET LANGUAGES \* English (UNITED STATES)  
 DATASET CHARACTER SET utf8 - 8 bit UCS Transfer Format

STATUS completed  
 SPATIAL REPRESENTATION TYPE \* vector

\* PROCESSING ENVIRONMENT Version 6.2 (Build 9200) ; Esri ArcGIS 10.4.1.5686

### CREDITS

Towill, Inc. extends thanks to the California Department of Water Resources.

### ARCGIS ITEM PROPERTIES

\* NAME Oroville\_Spillway\_02-24-2017\_Project\_Metadata  
 \* SIZE 0.001  
 \* LOCATION file:///\\ADMBRY\C\$\_towill\jobs\2017\14750-0109 DWR Oroville  
 Spillway\Metadata\Oroville\_Spillway\_02-24-2017\_Project\_Metadata.shp  
 \* ACCESS PROTOCOL Local Area Network

[Hide Resource Details ▲](#)

## Extents ►

### EXTENT

#### DESCRIPTION

The flight mission was performed between 10am and 2pm February 24, 2017

#### TEMPORAL EXTENT

BEGINNING DATE 2017-02-24 00:00:00  
 ENDING DATE 2017-02-24 00:00:00

#### VERTICAL EXTENT

\* MINIMUM VALUE 0.0  
 \* MAXIMUM VALUE 6000.0

### EXTENT

#### GEOGRAPHIC EXTENT

##### BOUNDING RECTANGLE

EXTENT TYPE Extent used for searching  
 \* WEST LONGITUDE -121.513345  
 \* EAST LONGITUDE -121.472067  
 \* NORTH LATITUDE 39.553193  
 \* SOUTH LATITUDE 39.525011  
 \* EXTENT CONTAINS THE RESOURCE Yes

#### EXTENT IN THE ITEM'S COORDINATE SYSTEM

\* WEST LONGITUDE 6698940.689496  
 \* EAST LONGITUDE 6710525.369351  
 \* SOUTH LATITUDE 2317650.271389  
 \* NORTH LATITUDE 2327851.021140  
 \* EXTENT CONTAINS THE RESOURCE Yes

[Hide Extents ▲](#)

## Resource Maintenance ►

## RESOURCE MAINTENANCE

UPDATE FREQUENCY unknown

[Hide Resource Maintenance ▲](#)**Spatial Reference ►**

## ARCGIS COORDINATE SYSTEM

\* TYPE Projected

\* GEOGRAPHIC COORDINATE REFERENCE GCS\_NAD\_1983\_2011

\* PROJECTION NAD\_1983\_2011\_StatePlane\_California\_II\_FIPS\_0402\_Ft\_US

\* COORDINATE REFERENCE DETAILS

## PROJECTED COORDINATE SYSTEM

WELL-KNOWN IDENTIFIER 103004

X ORIGIN -115211800

Y ORIGIN -93821500

XY SCALE 36983428.057351544

Z ORIGIN -100000

Z SCALE 10000

M ORIGIN -100000

M SCALE 10000

XY TOLERANCE 0.0032808333333333331

Z TOLERANCE 0.001

M TOLERANCE 0.001

HIGH PRECISION true

LATEST WELL-KNOWN IDENTIFIER 6418

WELL-KNOWN TEXT PROJCS

["NAD\_1983\_2011\_StatePlane\_California\_II\_FIPS\_0402\_Ft\_US",GEOGCS

["GCS\_NAD\_1983\_2011",DATUM["D\_NAD\_1983\_2011",SPHEROID

["GRS\_1980",6378137.0,298.257222101]],PRIMEM["Greenwich",0.0],UNIT

["Degree",0.0174532925199433]],PROJECTION["Lambert\_Conformal\_Conic"],PARAMETER

["False\_Easting",6561666.666666666],PARAMETER

["False\_Northing",1640416.666666667],PARAMETER["Central\_Meridian",-

122.0],PARAMETER["Standard\_Parallel\_1",38.33333333333334],PARAMETER

["Standard\_Parallel\_2",39.83333333333334],PARAMETER

["Latitude\_Of\_Origin",37.66666666666667],UNIT

["Foot\_US",0.3048006096012192],AUTHORITY["EPSG",6418]]

## REFERENCE SYSTEM IDENTIFIER

\* VALUE 6418

\* CODESPACE EPSG

\* VERSION 8.2.10(10.3.1)

[Hide Spatial Reference ▲](#)**Spatial Data Properties ►**

## VECTOR ►

\* LEVEL OF TOPOLOGY FOR THIS DATASET geometry only

## GEOMETRIC OBJECTS

FEATURE CLASS NAME Oroville\_Spillway\_02-24-2017\_Project\_Metadata

\* OBJECT TYPE composite

\* OBJECT COUNT 1

[Hide Vector ▲](#)

## ARCGIS FEATURE CLASS PROPERTIES ►

FEATURE CLASS NAME Oroville\_Spillway\_02-24-2017\_Project\_Metadata

\* FEATURE TYPE Simple

\* GEOMETRY TYPE Polygon

\* HAS TOPOLOGY FALSE

\* FEATURE COUNT 1

\* SPATIAL INDEX TRUE

\* LINEAR REFERENCING TRUE

*Hide ArcGIS Feature Class Properties ▲**Hide Spatial Data Properties ▲***Data Quality ►**

## SCOPE OF QUALITY INFORMATION ►

RESOURCE LEVEL dataset

*Hide Scope of quality information ▲*

## DATA QUALITY REPORT - ABSOLUTE EXTERNAL POSITIONAL ACCURACY ►

DIMENSION vertical

## MEASURE DESCRIPTION

QA/QC checkpoints were used to verify the dataset meets horizontal and vertical accuracy standards.

*Hide Data quality report - Absolute external positional accuracy ▲**Hide Data Quality ▲***Lineage ►**

## SOURCE DATA ►

## DESCRIPTION

Data developed through aerial survey methods.

SOURCE MEDIUM NAME hard disk

*Hide Source data ▲**Hide Lineage ▲***Distribution ►**

## DISTRIBUTION FORMAT

\* NAME Shapefile

## TRANSFER OPTIONS

\* TRANSFER SIZE 0.001

[Hide Distribution ▲](#)

## Fields ►

DETAILS FOR OBJECT [Oroville\\_Spillway\\_02-24-2017\\_Project\\_Metadata ►](#)

\* TYPE Feature Class

\* ROW COUNT 1

### FIELD FID ►

\* ALIAS FID

\* DATA TYPE OID

\* WIDTH 4

\* PRECISION 0

\* SCALE 0

\* FIELD DESCRIPTION

Internal feature number.

\* DESCRIPTION SOURCE

Esri

\* DESCRIPTION OF VALUES

Sequential unique whole numbers that are automatically generated.

[Hide Field FID ▲](#)

### FIELD Shape ►

\* ALIAS Shape

\* DATA TYPE Geometry

\* WIDTH 0

\* PRECISION 0

\* SCALE 0

\* FIELD DESCRIPTION

Feature geometry.

\* DESCRIPTION SOURCE

Esri

\* DESCRIPTION OF VALUES

Coordinates defining the features.

[Hide Field Shape ▲](#)

### FIELD Name ►

\* ALIAS Name

\* DATA TYPE String

\* WIDTH 254

\* PRECISION 0

\* SCALE 0

[Hide Field Name ▲](#)

[Hide Details for object Oroville\\_Spillway\\_02-24-2017\\_Project\\_Metadata ▲](#)

DETAILS FOR OBJECT   **Attributes**

[Hide Fields ▲](#)

## Metadata Details ►

- \* METADATA LANGUAGE   English (UNITED STATES)
- \* METADATA CHARACTER SET   utf8 - 8 bit UCS Transfer Format

SCOPE OF THE DATA DESCRIBED BY THE METADATA   \* dataset  
SCOPE NAME   \* dataset

\* LAST UPDATE   2017-03-31

### ARCGIS METADATA PROPERTIES

METADATA FORMAT   ArcGIS 1.0  
METADATA STYLE   FGDC CSDGM Metadata  
STANDARD OR PROFILE USED TO EDIT METADATA   FGDC

CREATED IN ARCGIS FOR THE ITEM   2017-03-31   08:10:10  
LAST MODIFIED IN ARCGIS FOR THE ITEM   2017-03-31   16:30:40

### AUTOMATIC UPDATES

HAVE BEEN PERFORMED   Yes  
LAST UPDATE   2017-03-31   16:23:47

[Hide Metadata Details ▲](#)

## Metadata Contacts ►

### METADATA CONTACT

INDIVIDUAL'S NAME   Brian Young  
ORGANIZATION'S NAME   Towill, Inc.  
CONTACT'S POSITION   Vice President  
CONTACT'S ROLE   point of contact

### CONTACT INFORMATION ►

PHONE  
VOICE   925-682-6976

### ADDRESS

TYPE   both  
DELIVERY POINT   2300 Clayton Road, Suite 1200  
CITY   Concord  
ADMINISTRATIVE AREA   California  
POSTAL CODE   94520  
COUNTRY   US  
E-MAIL ADDRESS   brian.young@towill.com

[Hide Contact information ▲](#)

[Hide Metadata Contacts ▲](#)

## Thumbnail and Enclosures ►

THUMBNAIL

THUMBNAIL TYPE    JPG

[Hide Thumbnail and Enclosures ▲](#)

## FGDC Metadata (read-only) ▼
