# Supplementary figures and images for: Seismic signature of turbulence during the 2017 Oroville Dam spillway erosion crisis
Source: Copernicus journal article supplement (doi:10.5194/esurf-2017-71), 2018-01-02

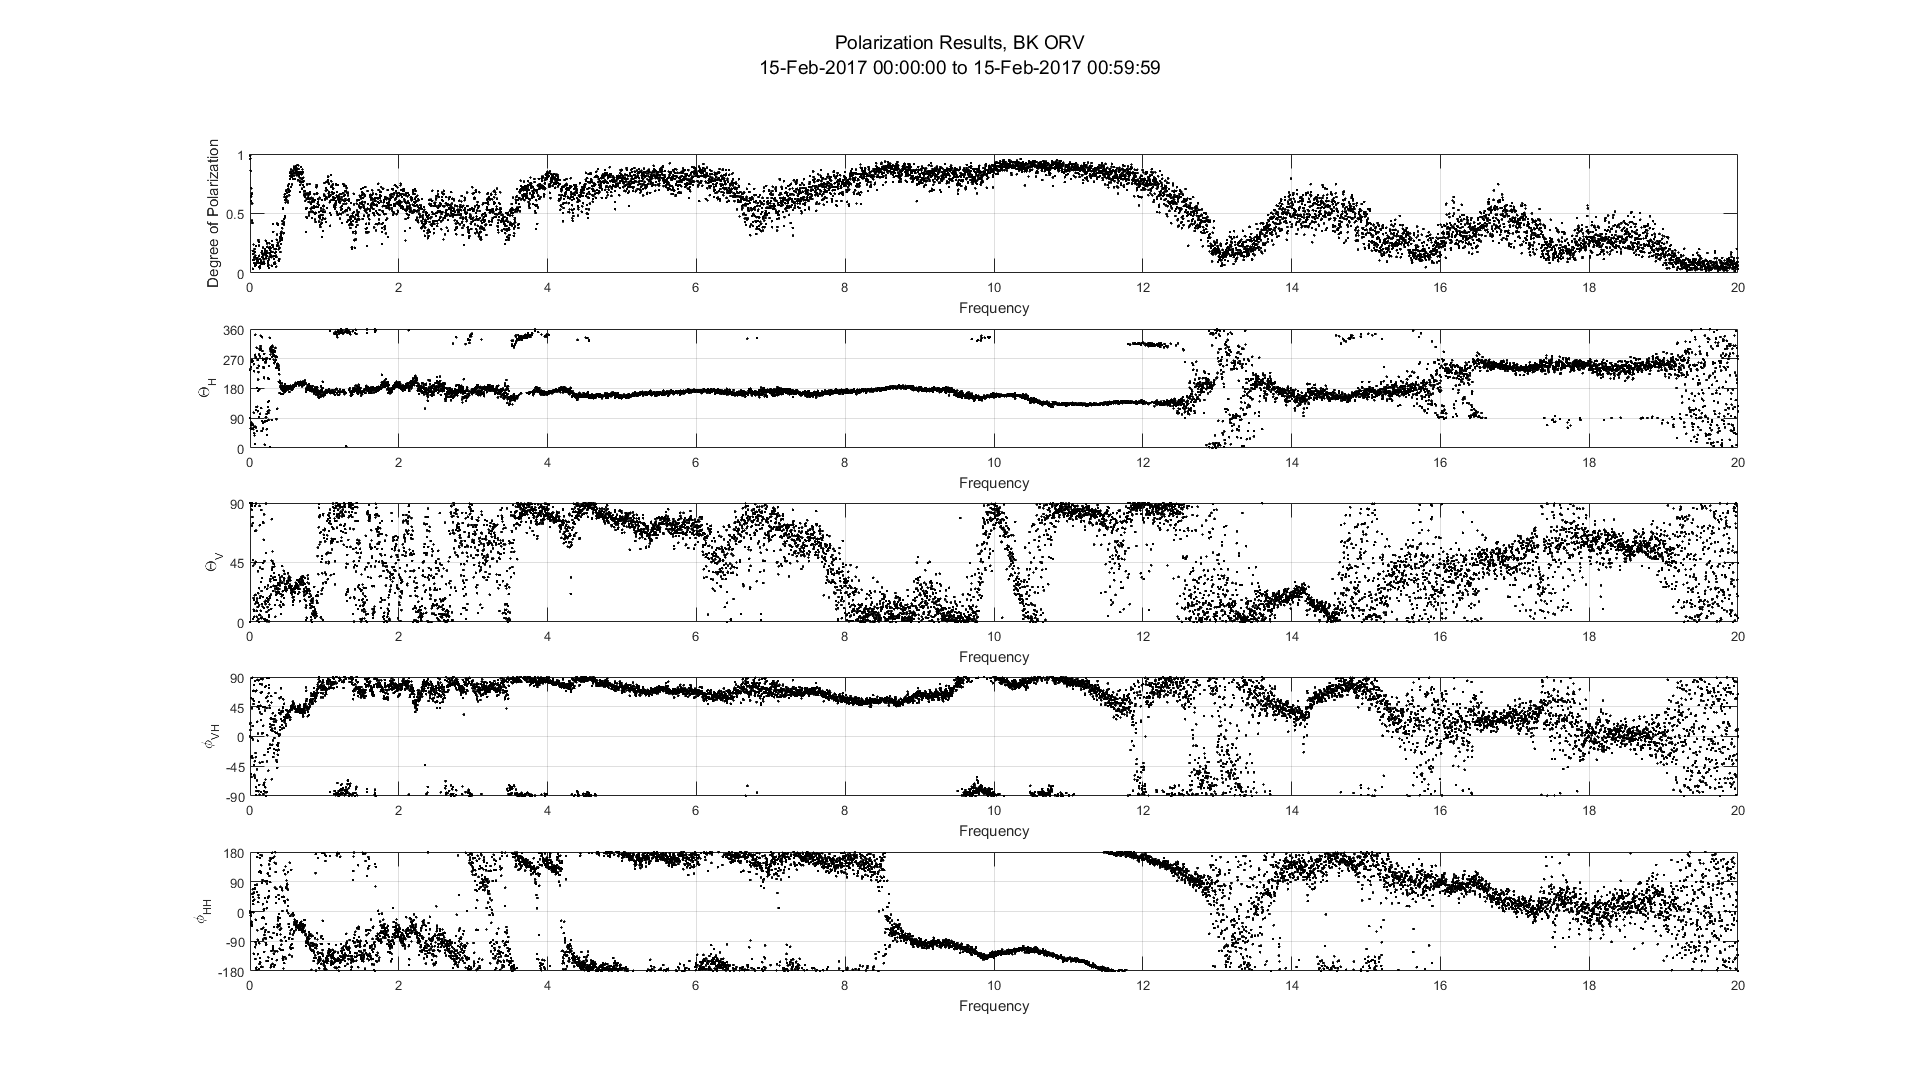

Supplement: Supplementary file 1 [file esurf-2017-71-supplement.zip › Example FDPA on ORV Data/Fig_1_Polarization_Results.png]

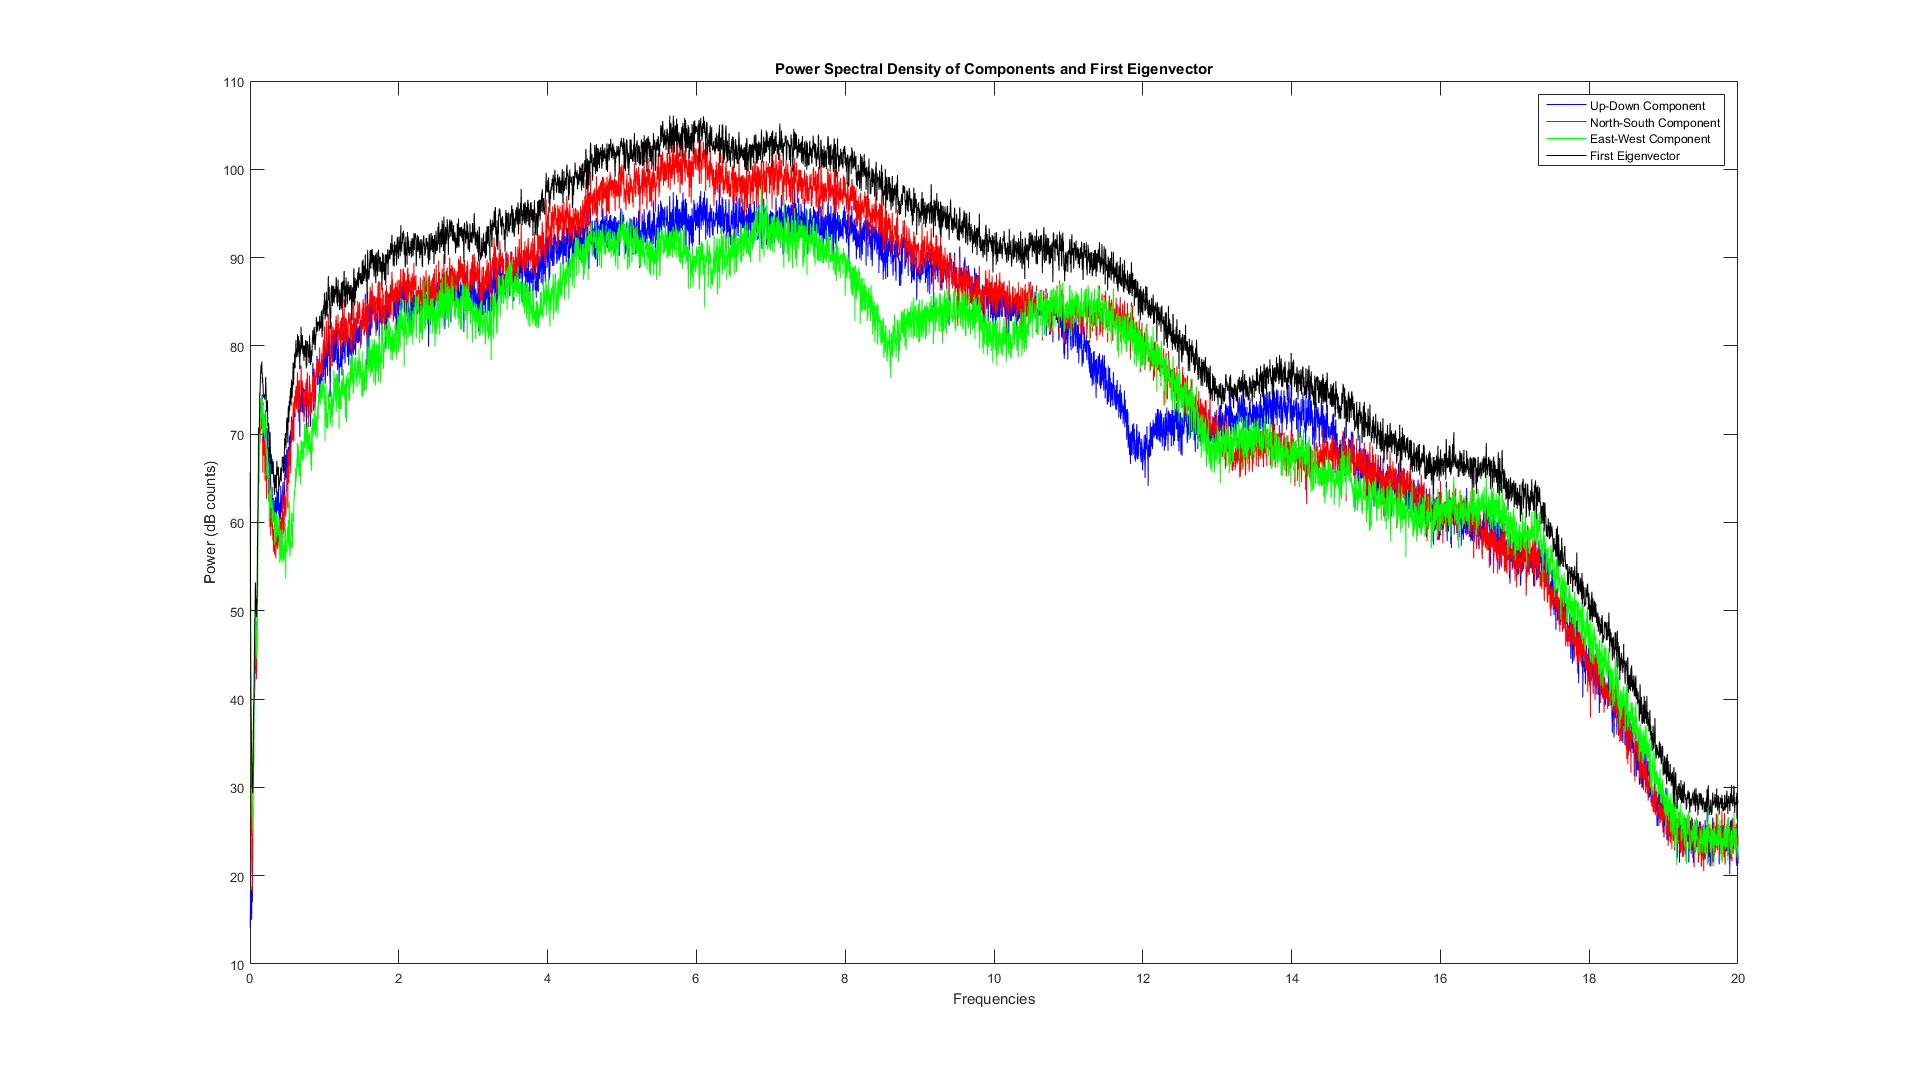

Supplement: Supplementary file 1 [file esurf-2017-71-supplement.zip › Example FDPA on ORV Data/Fig_2_Component_PSD.png]
